# Supplementary material
Source: publisher figshare collection journal article supplement (https://geolsoc.figshare.com/articles/dataset/_/3453365)
Supplement: Supplementary file 4 [file 1]

TRANSCAUCASUS

Achara-  
Trialet  
Zone

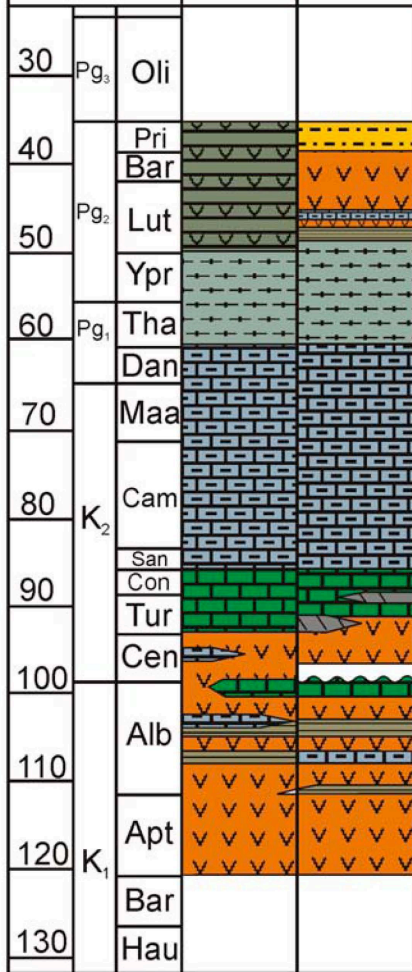

-  conglomerates
-  sandstones mainly
-  clastics, silts and shales
-  shales and claystones
-  marls
-  limestones mainly
-  siliceous shales and limestones
-  turbidites
-  basalts, andesites
-  andesites, rhyolites
