# Supplementary material
Source: publisher figshare collection journal article supplement (https://geolsoc.figshare.com/articles/dataset/_/3453365)

TRANSCAUCASUS

Achara-  
Trialet  
Zone

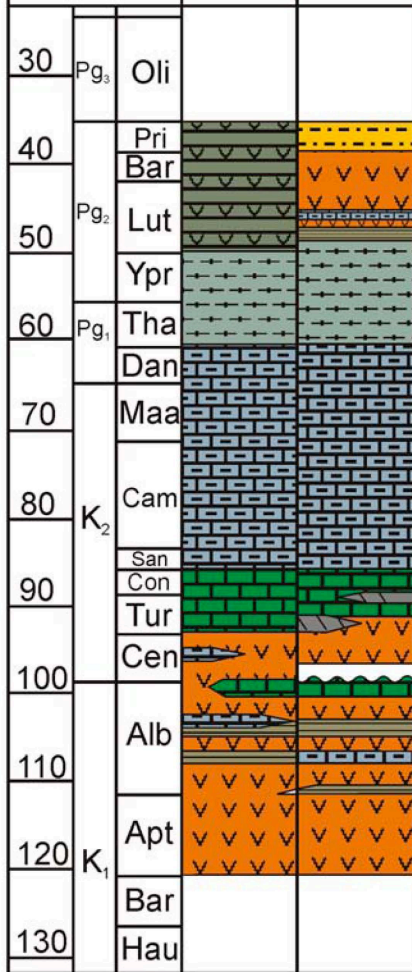

-  conglomerates
-  sandstones mainly
-  clastics, silts and shales
-  shales and claystones
-  marls
-  limestones mainly
-  siliceous shales and limestones
-  turbidites
-  basalts, andesites
-  andesites, rhyolites

# GREAT CAUCASUS TROUGH

Axial zone      Southern margin

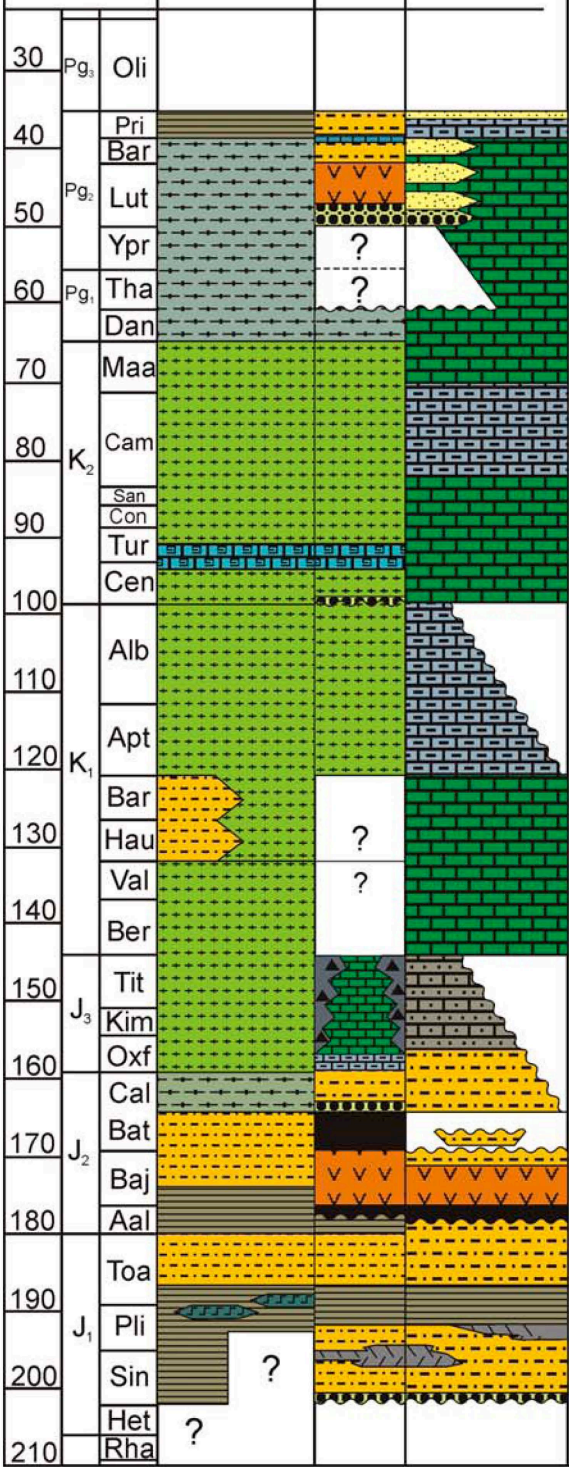

-  conglomerates
-  sandstones mainly
-  clastics, silts and shales
-  shales and claystones
-  marls
-  limestones mainly
-  siliceous shales and limestones
-  pelagic limestones, marls and shales
-  turbidites
-  breccia
-  basalts
-  basalts, andesites
-  andesites, rhyolites

## Pontides

## Inner Pontides

## Outer Pontides

S

N

## Munzur Mountains

## Maden

## Alucra

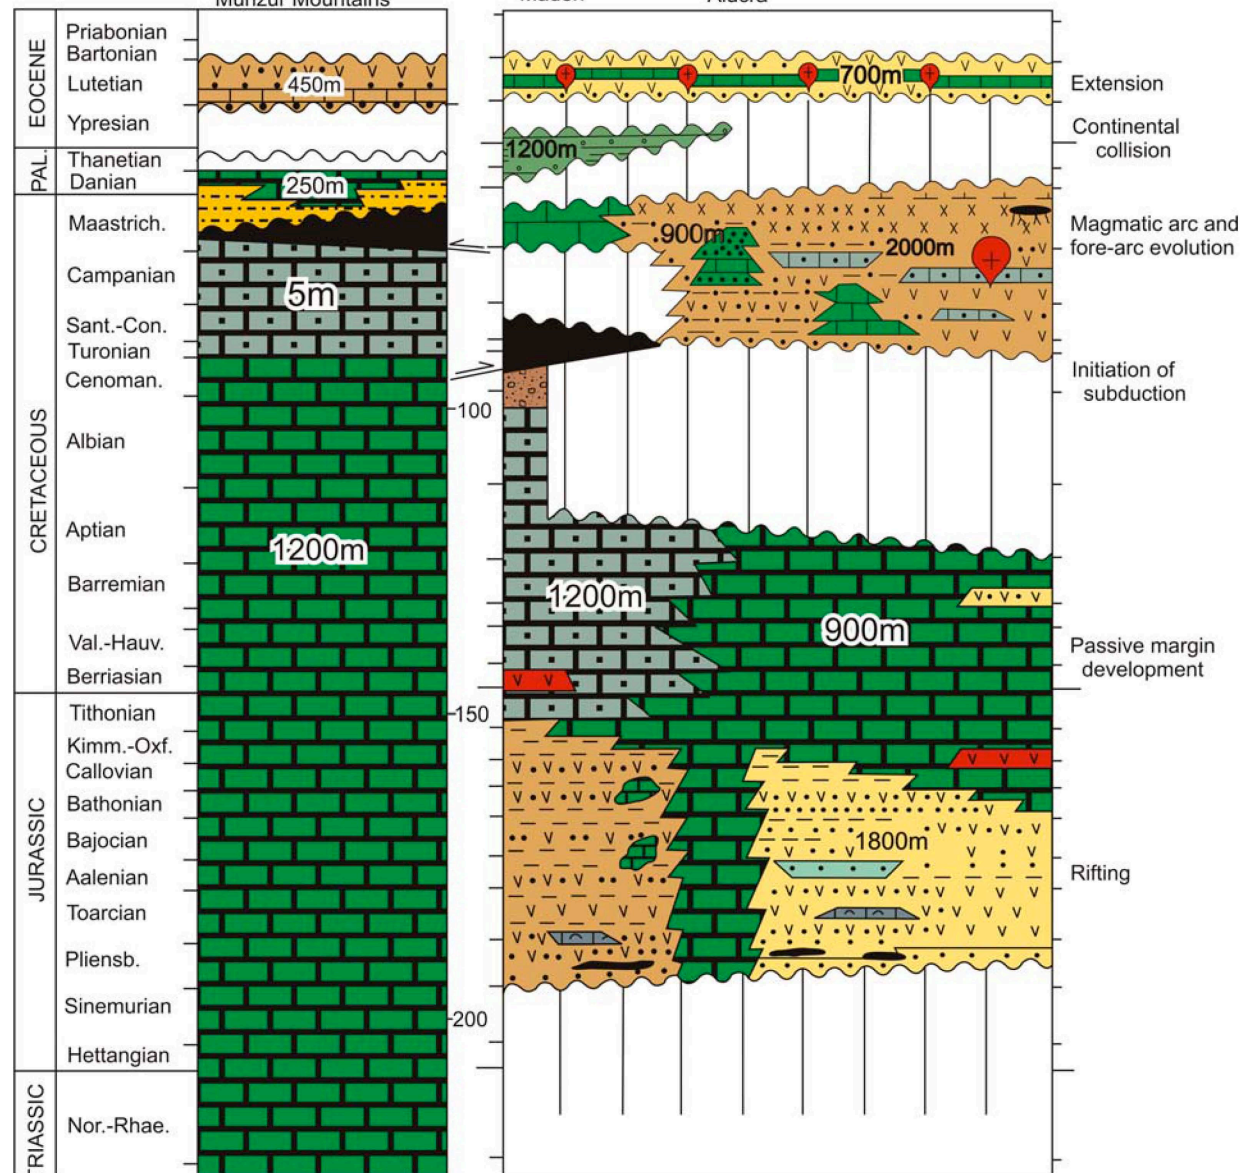

Supplement: Supplementary file 10 [file 1]
