# Supplementary material
Source: publisher figshare collection journal article supplement (https://geolsoc.figshare.com/articles/dataset/_/3453365)

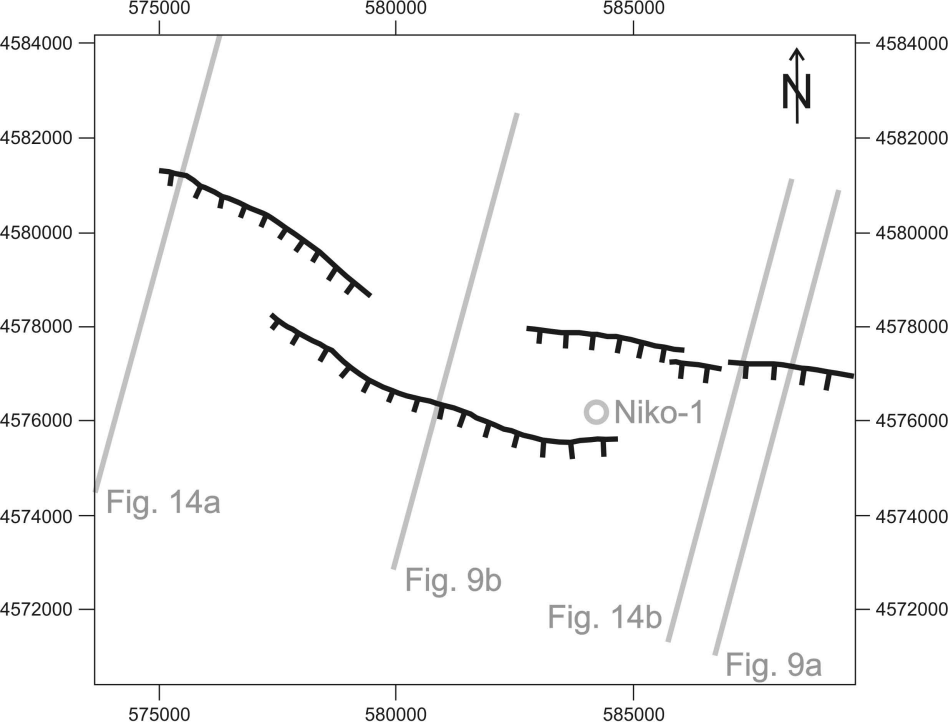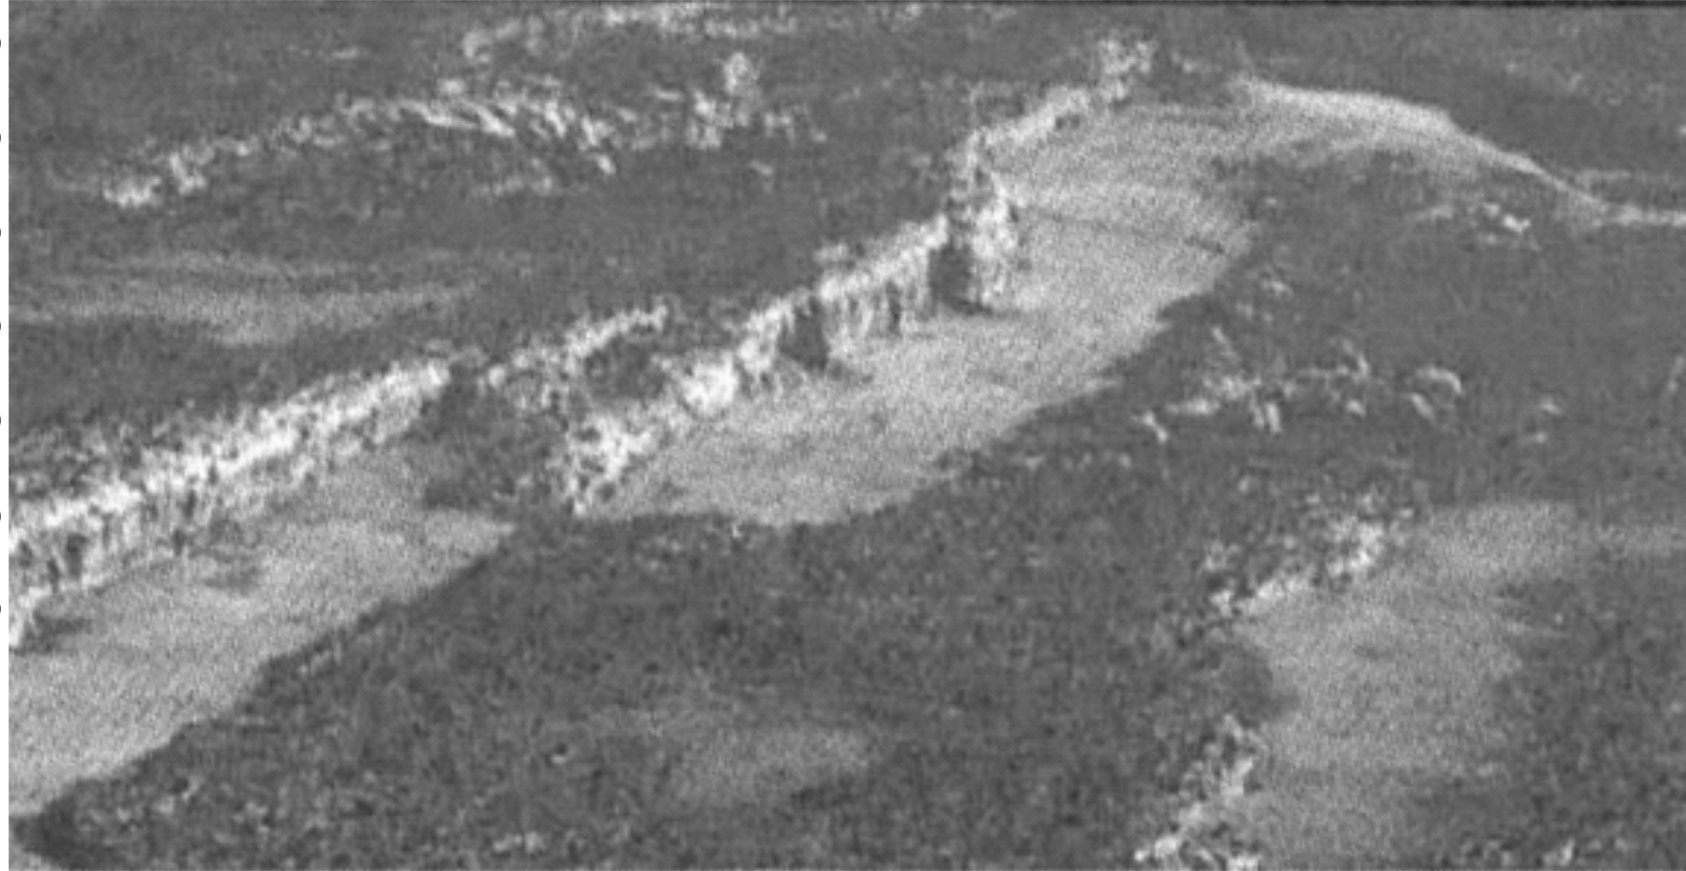

Supplement: Supplementary file 1 [file 1]

N

S

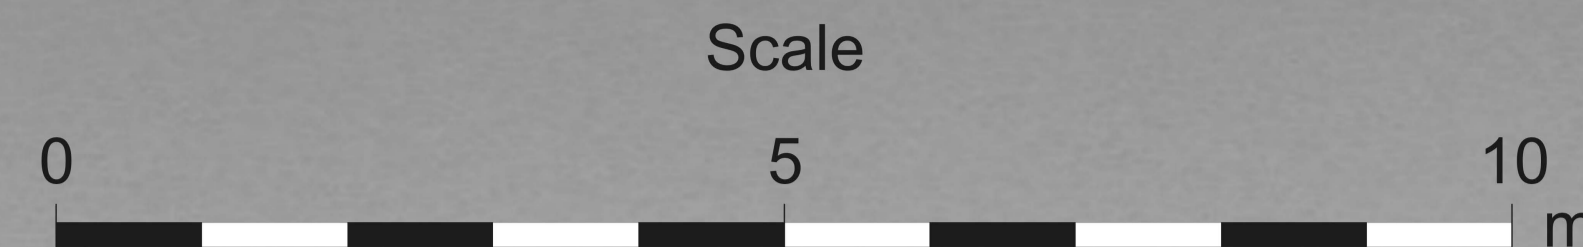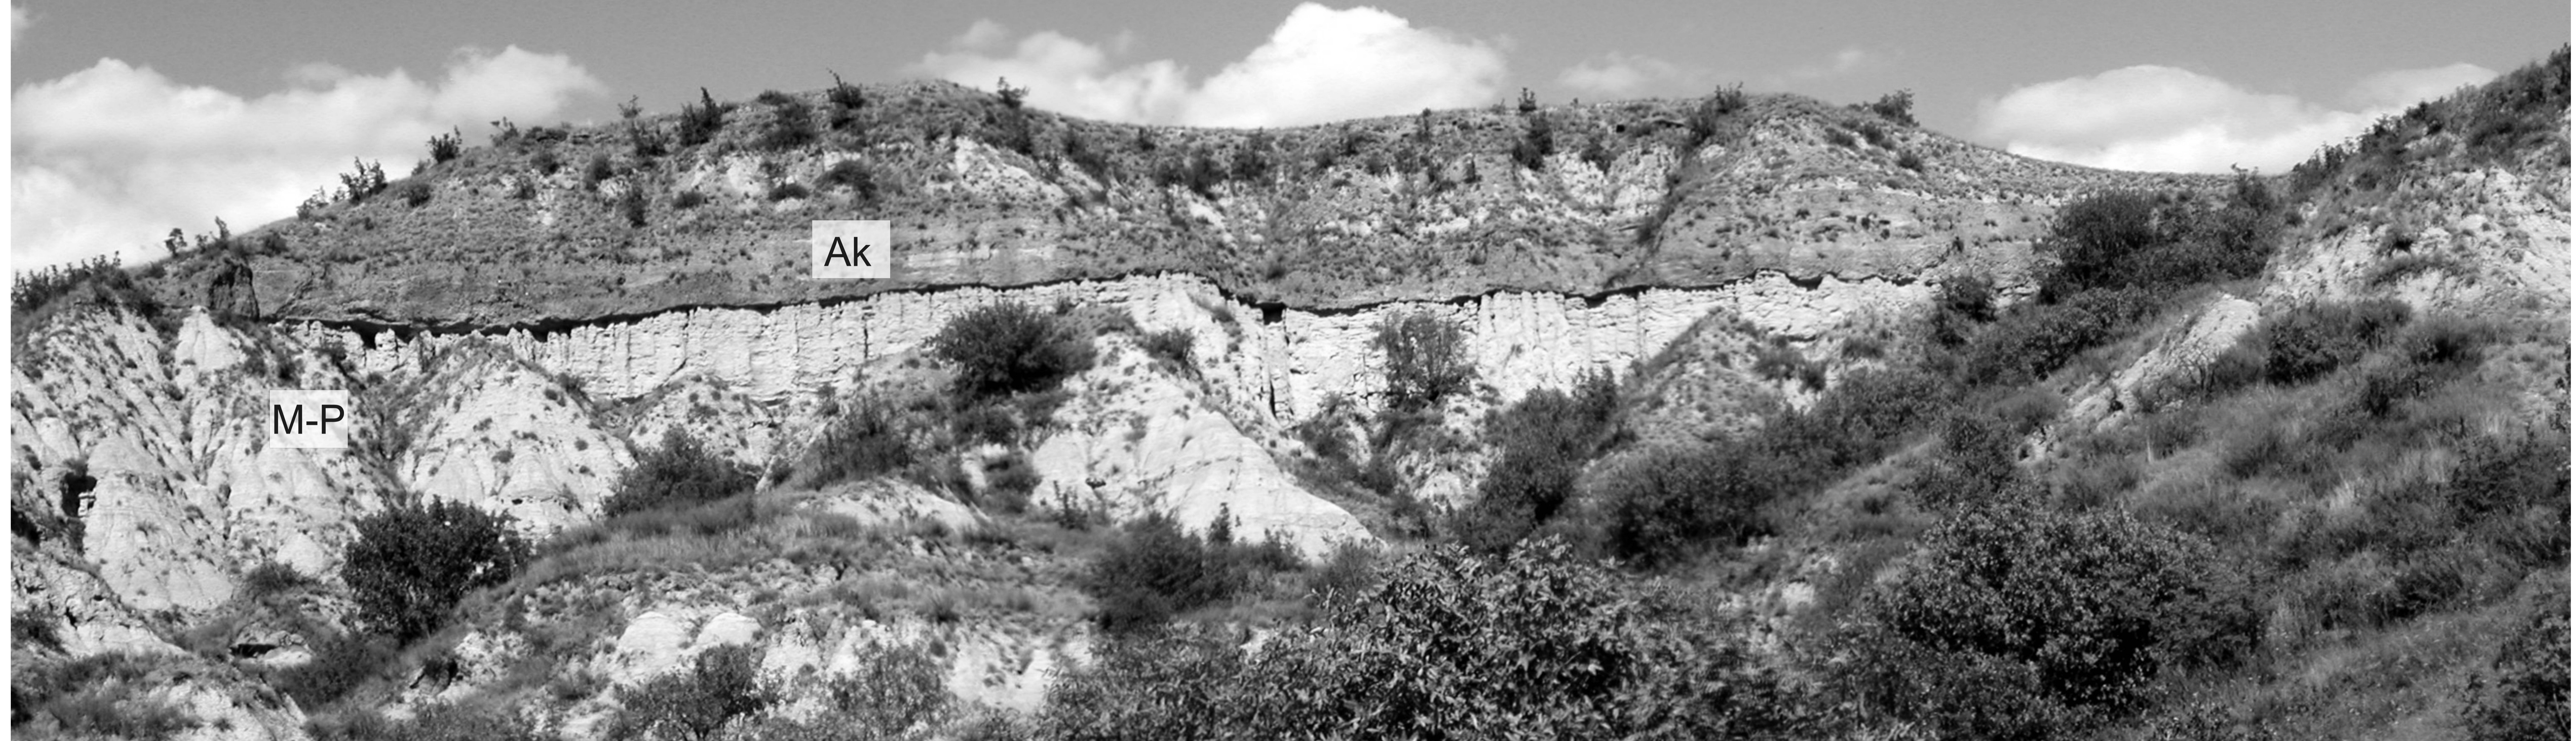

M-P

Ak

Supplement: Supplementary file 2 [file 1]

Equal Area  
(Schmidt)

N

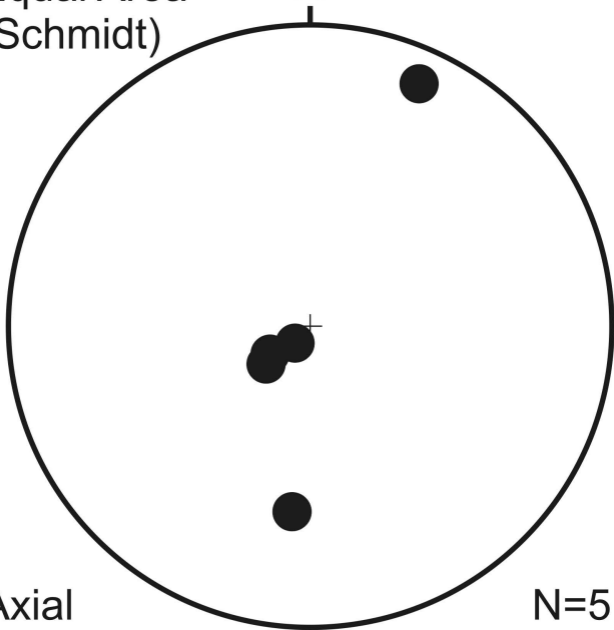

Axial

N=5

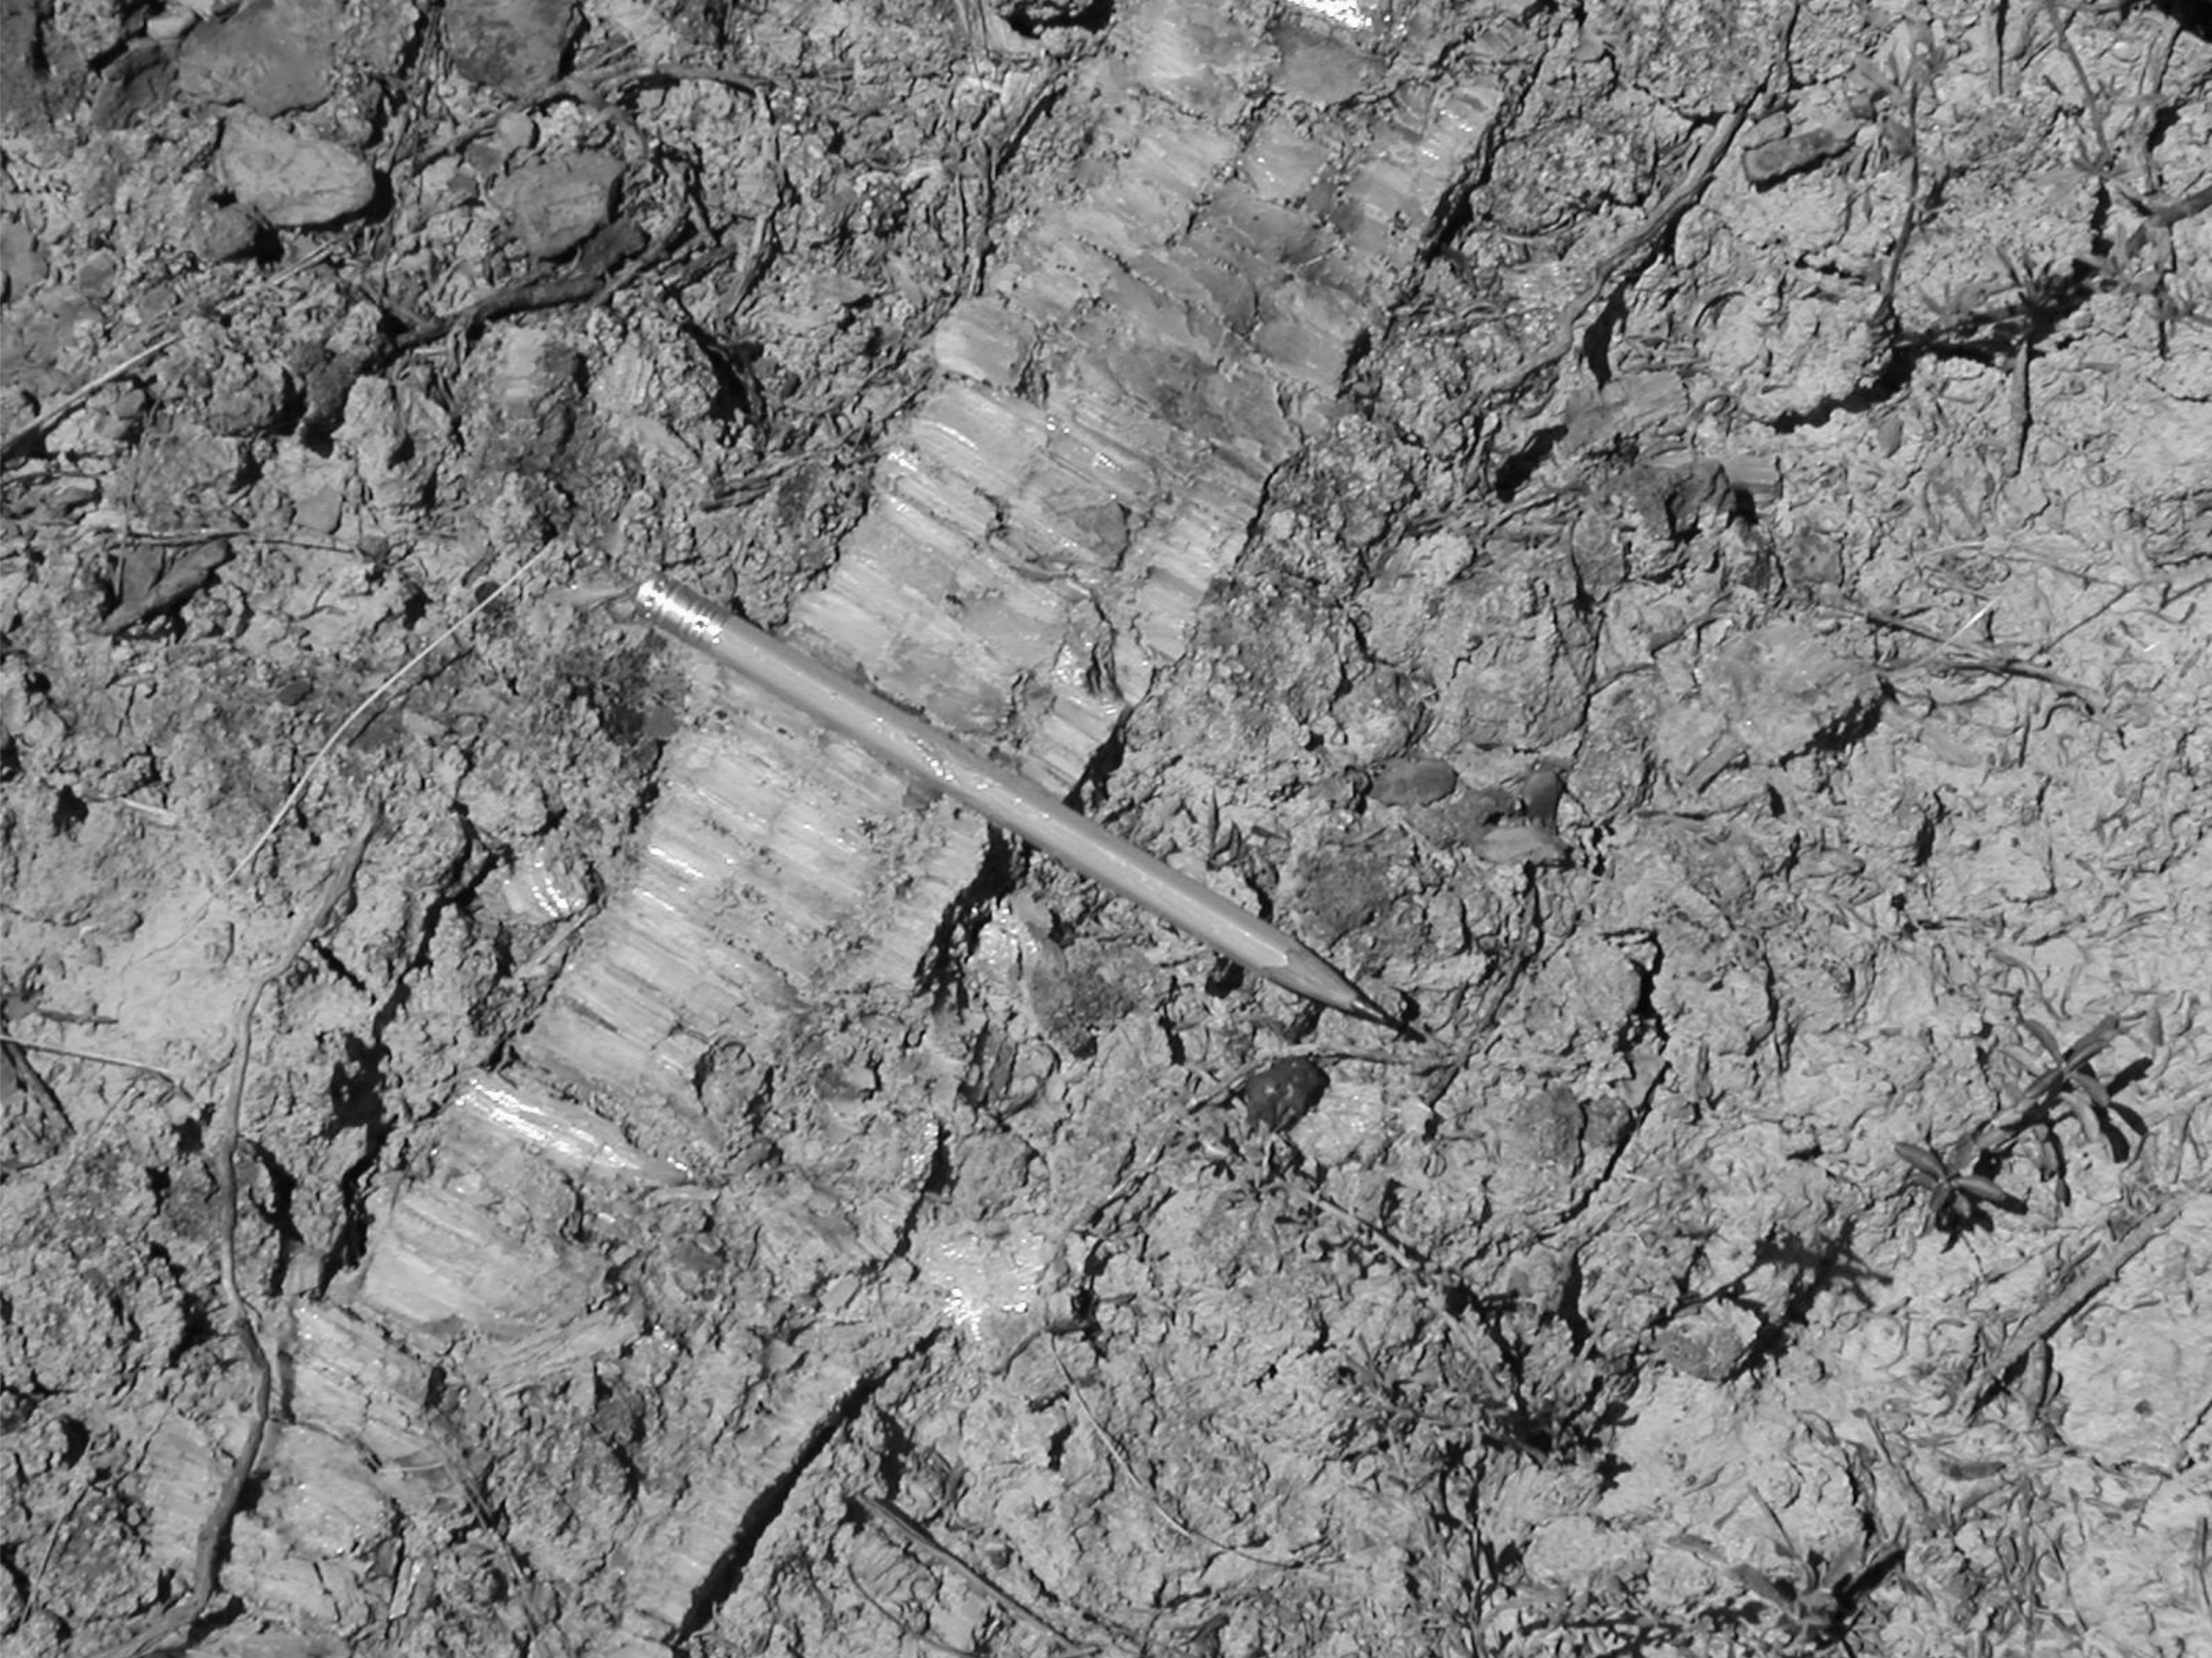

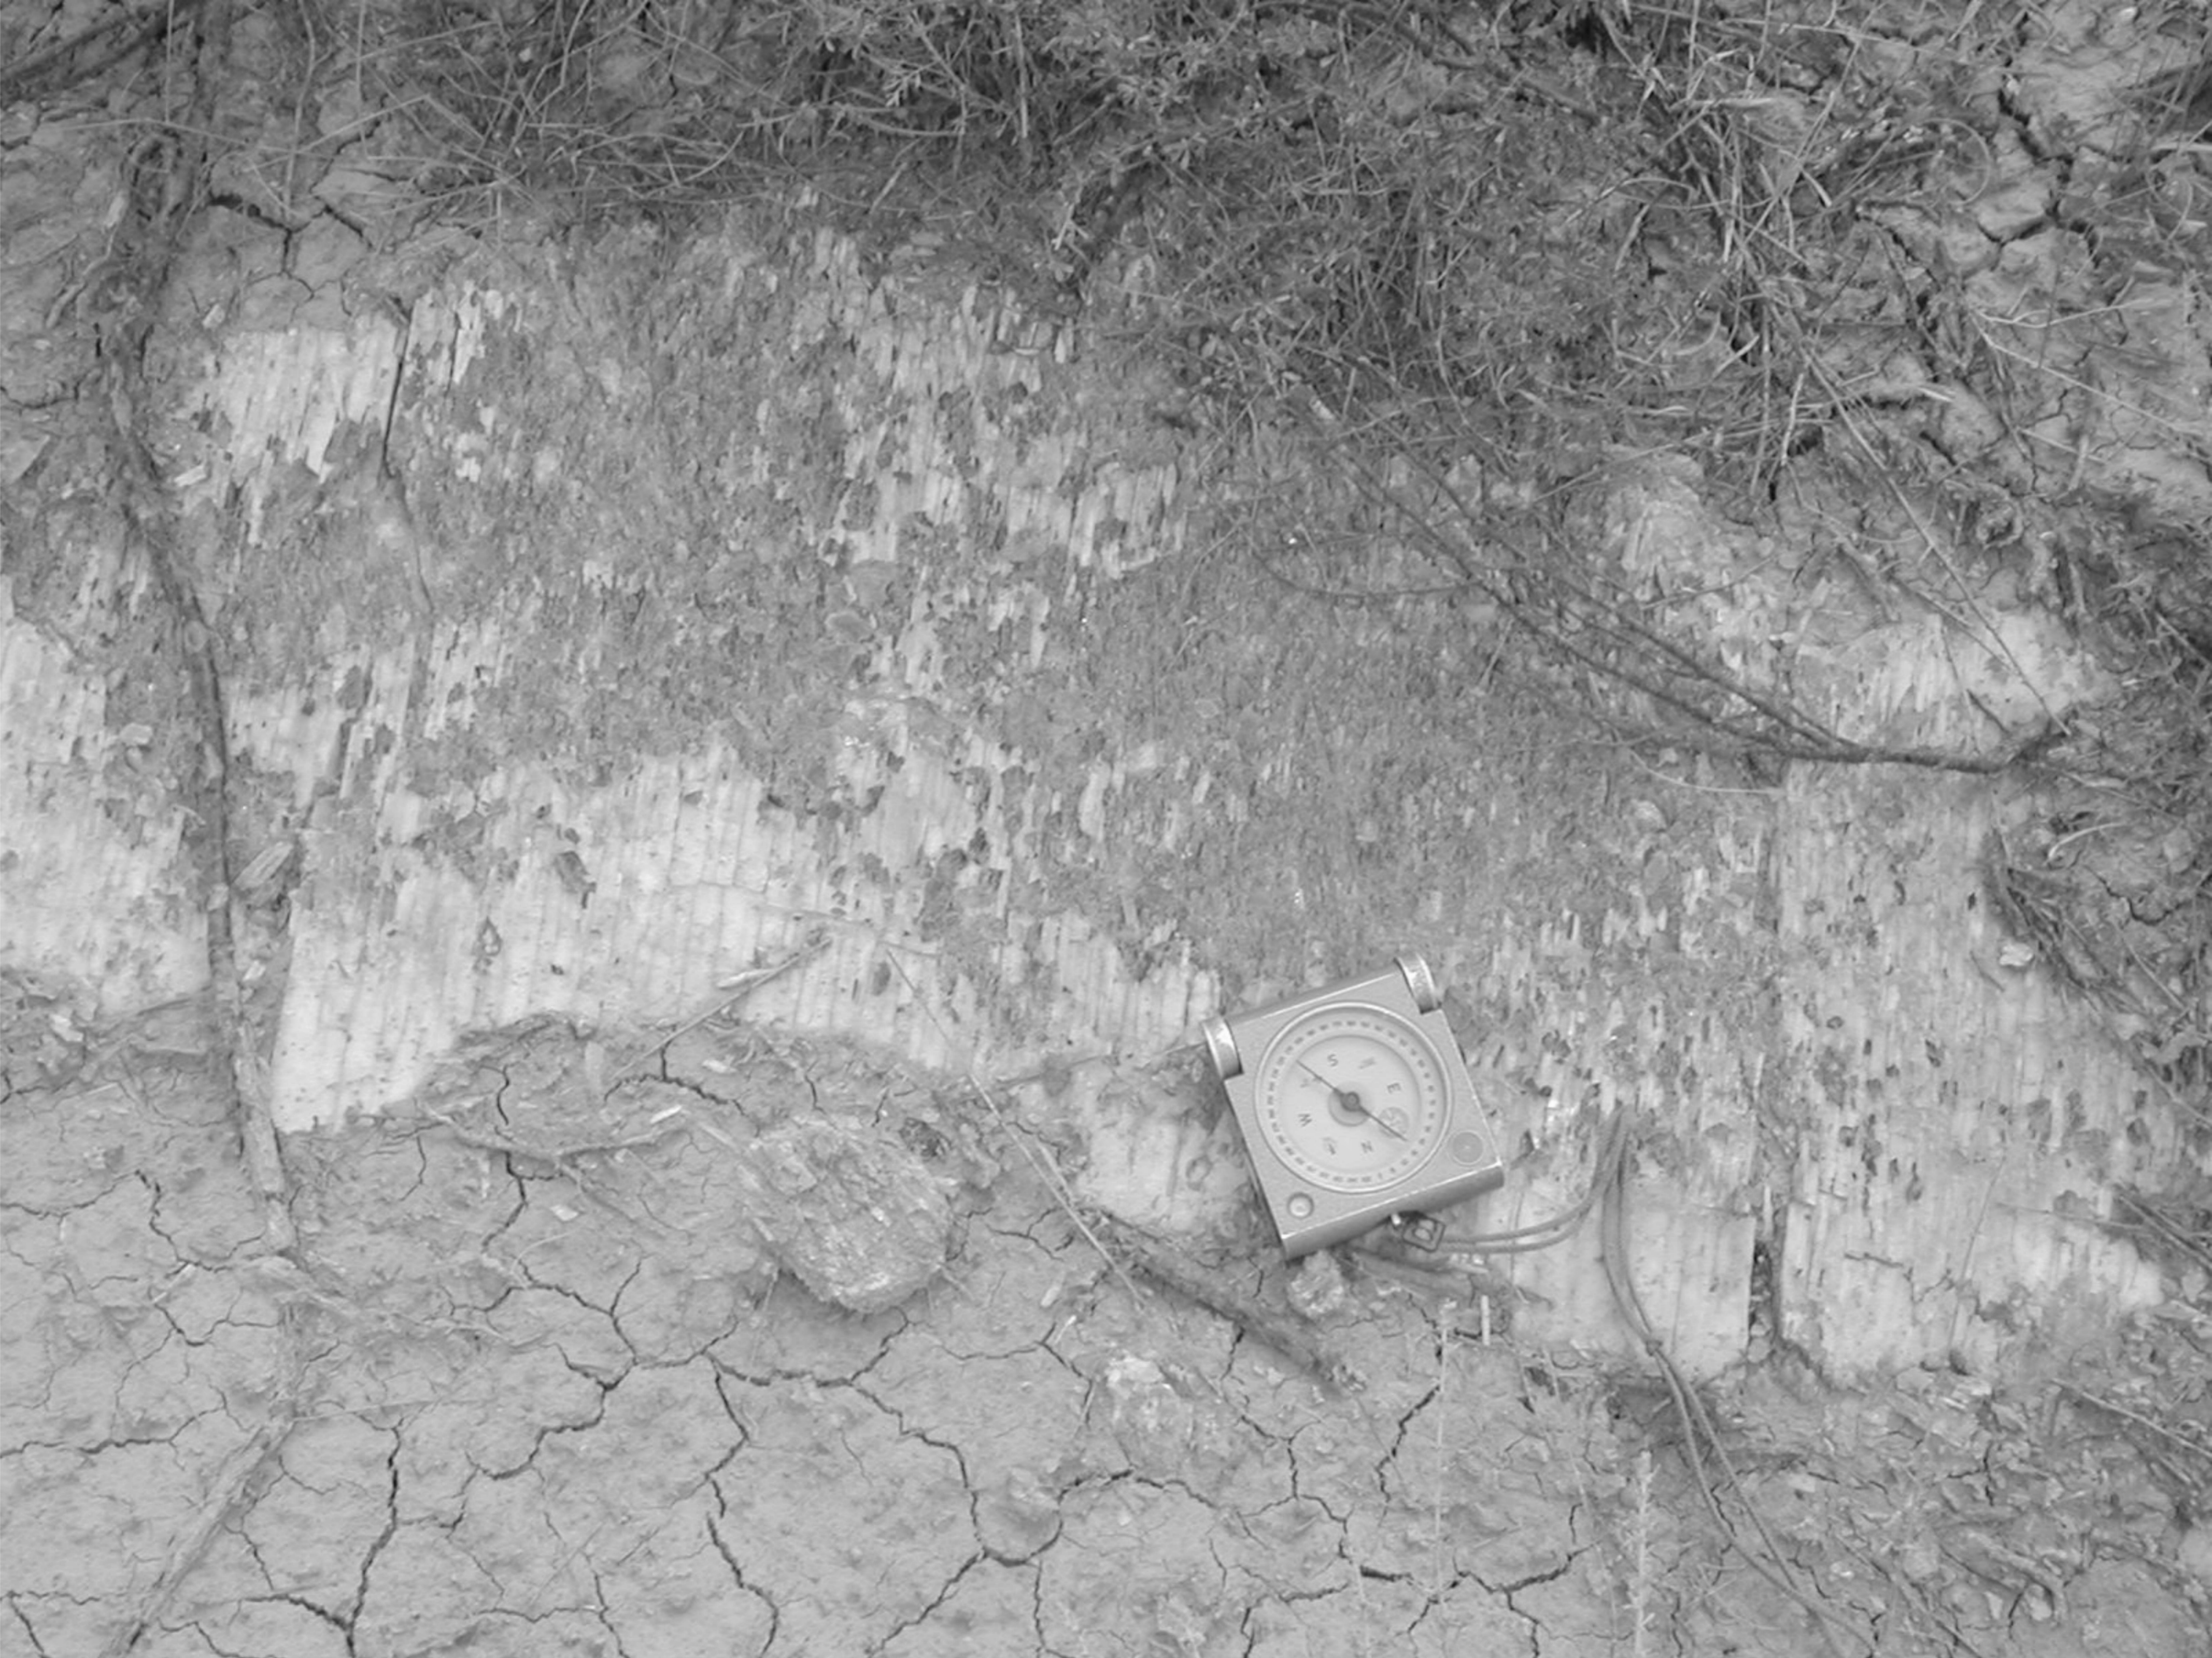

Supplement: Supplementary file 3 [file 1]

# Ionian Zone

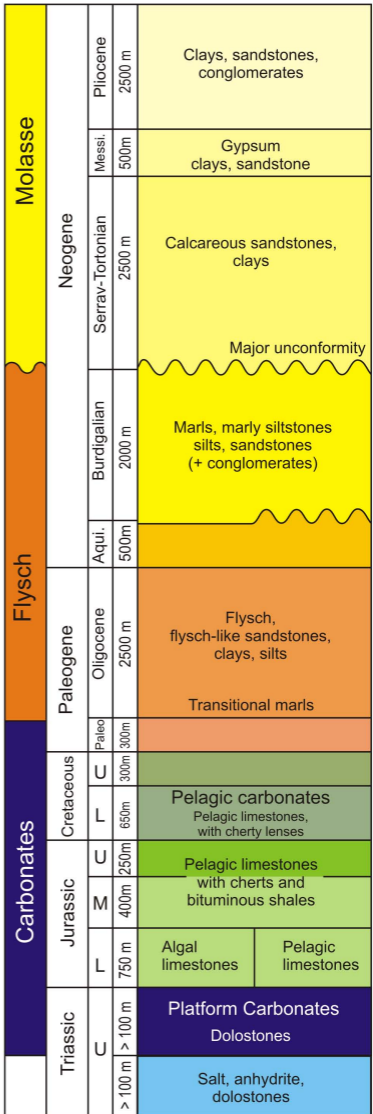

decollement

Supplement: Supplementary file 6 [file 1]

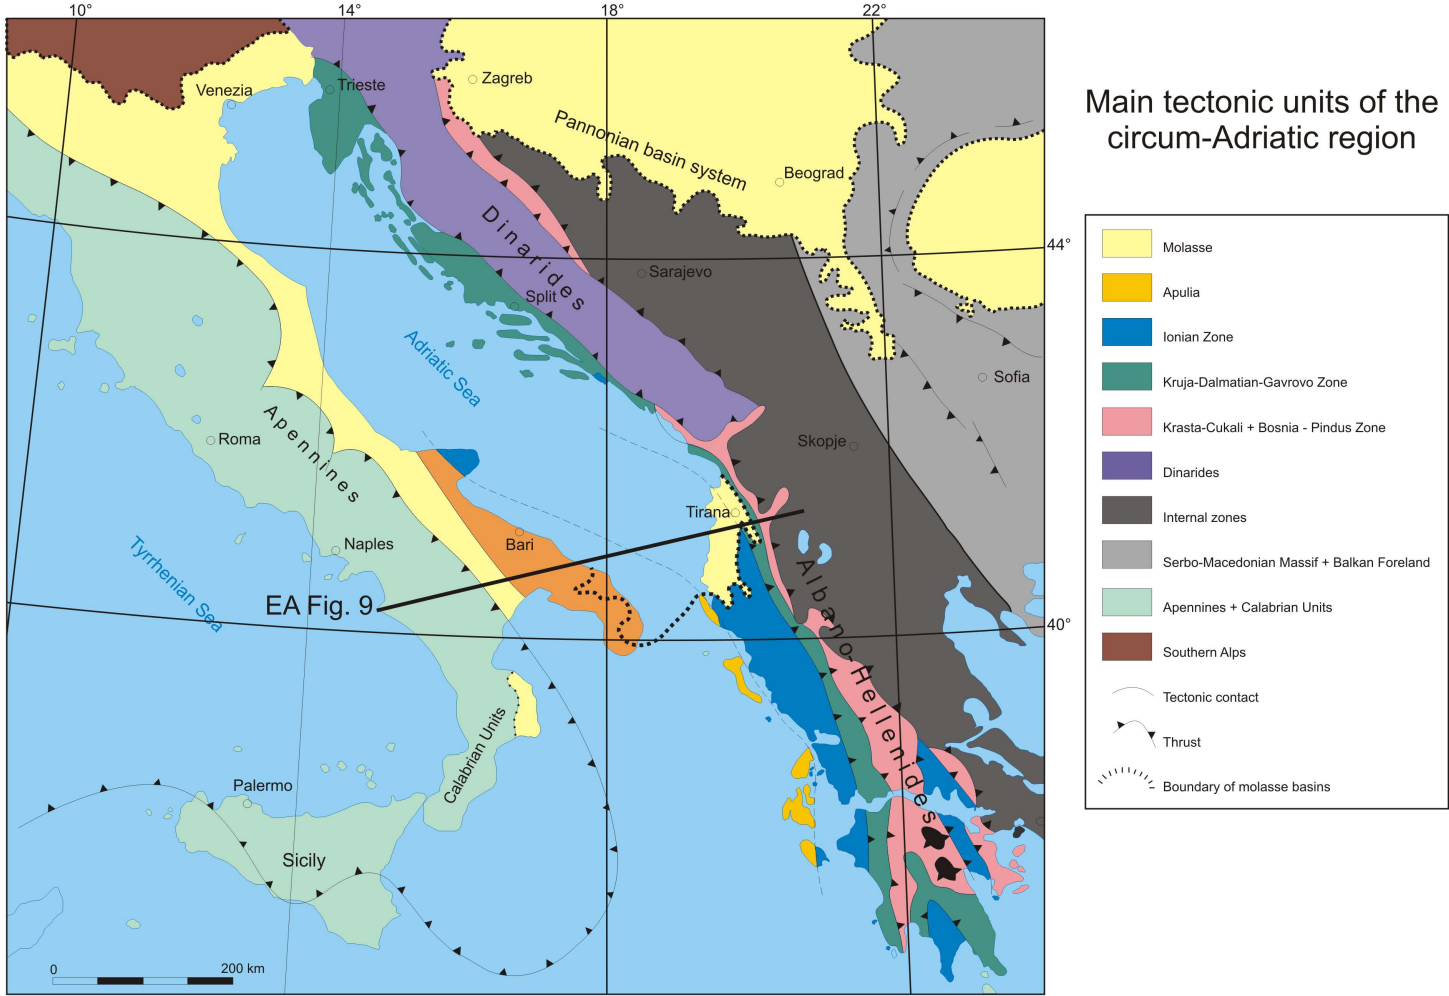

Supplement: Supplementary file 7 [file 1]

Lesser Caucasus (Adjara-Trialet Zone) orogenic system

Greater Caucasus orogenic system

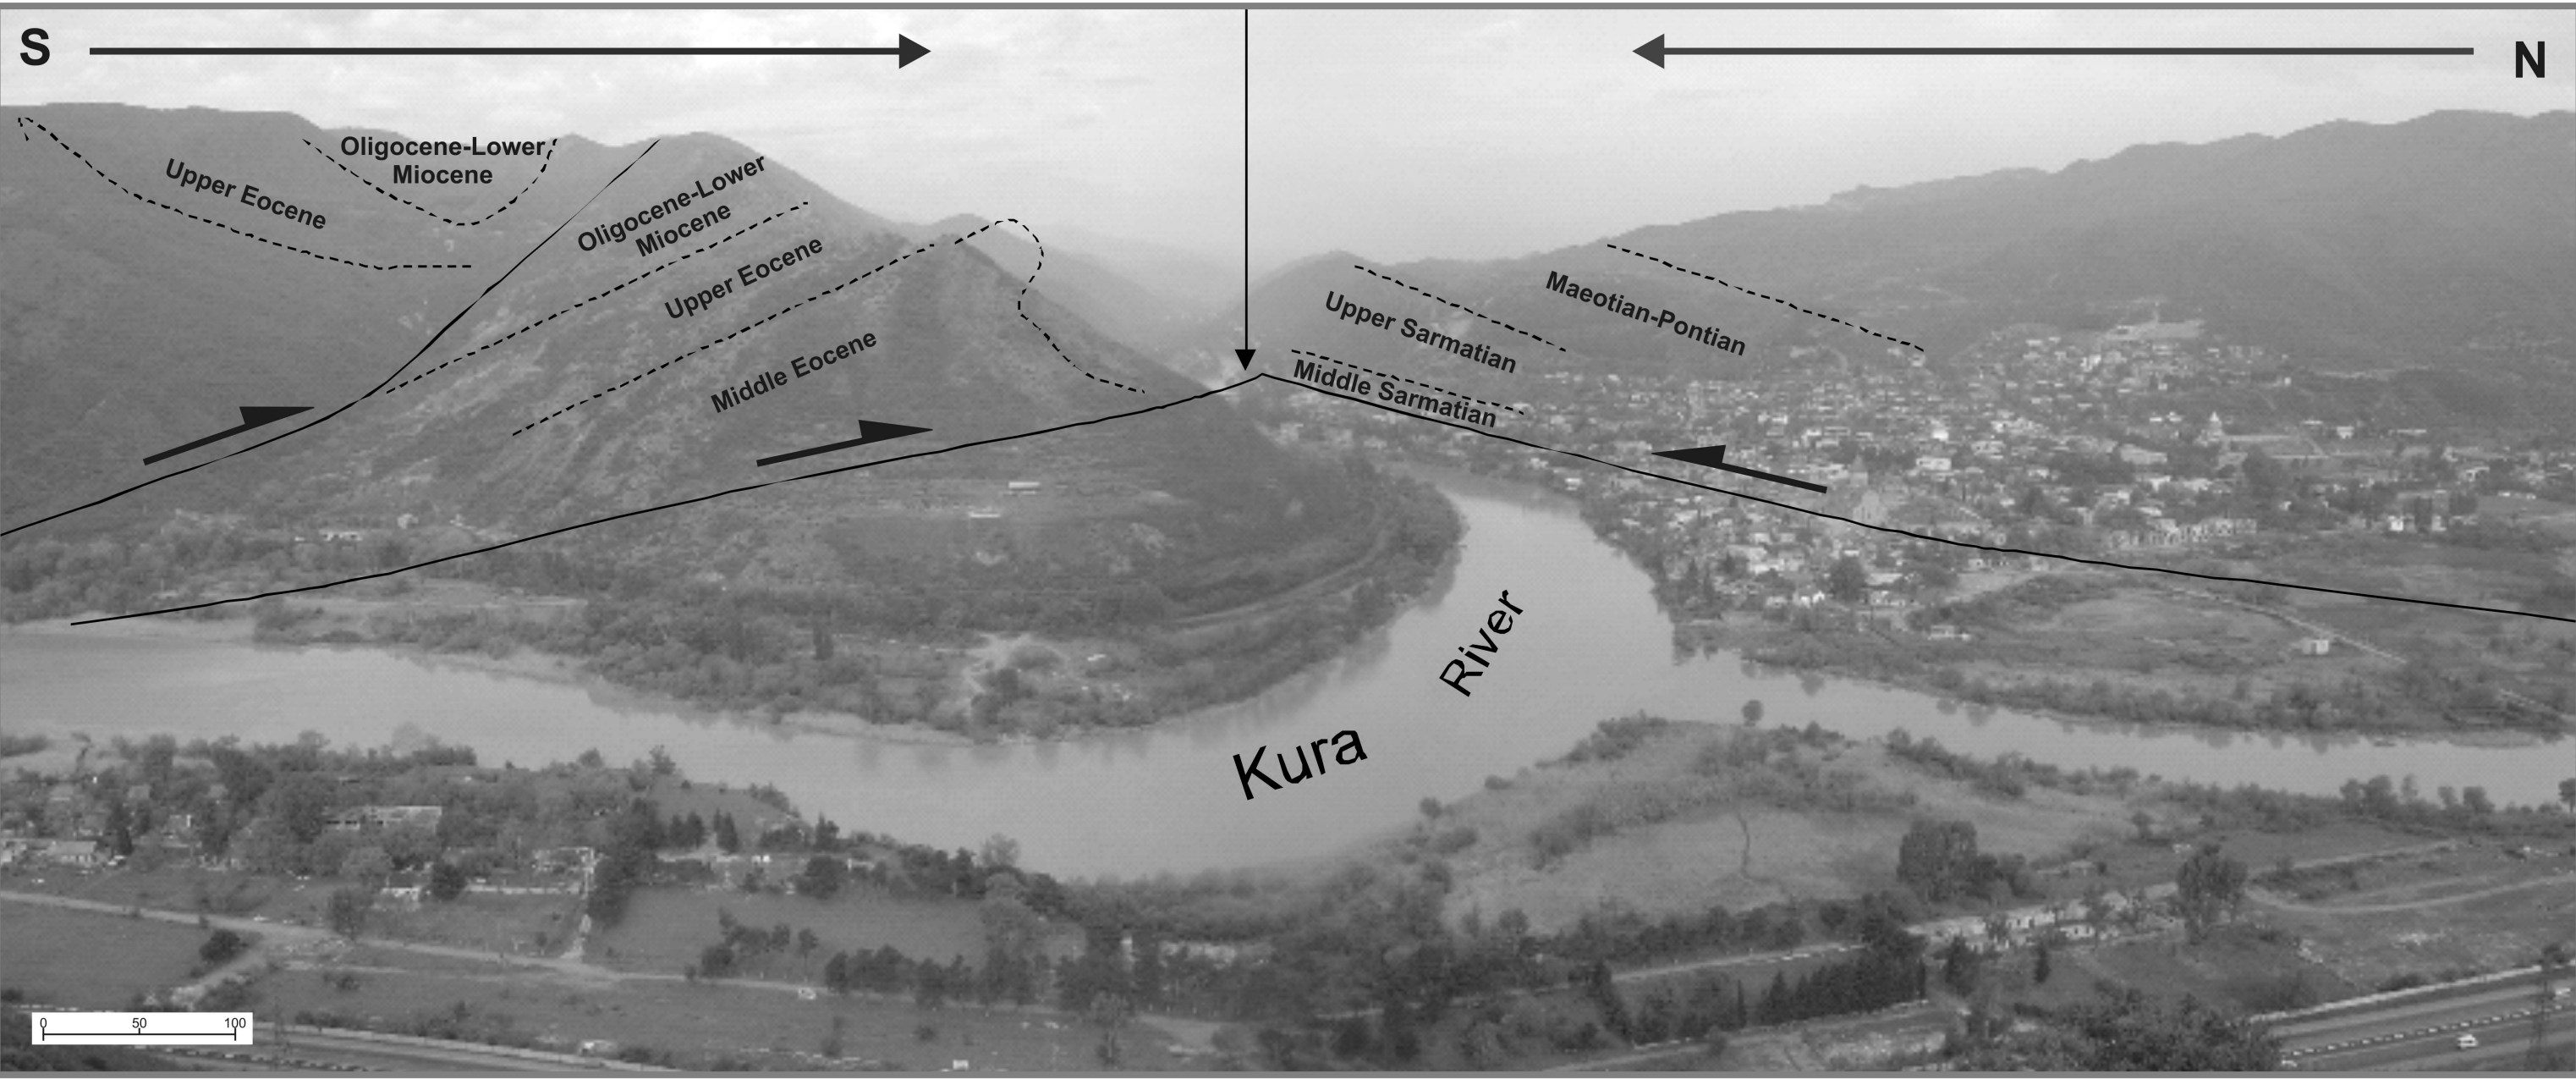

N

S

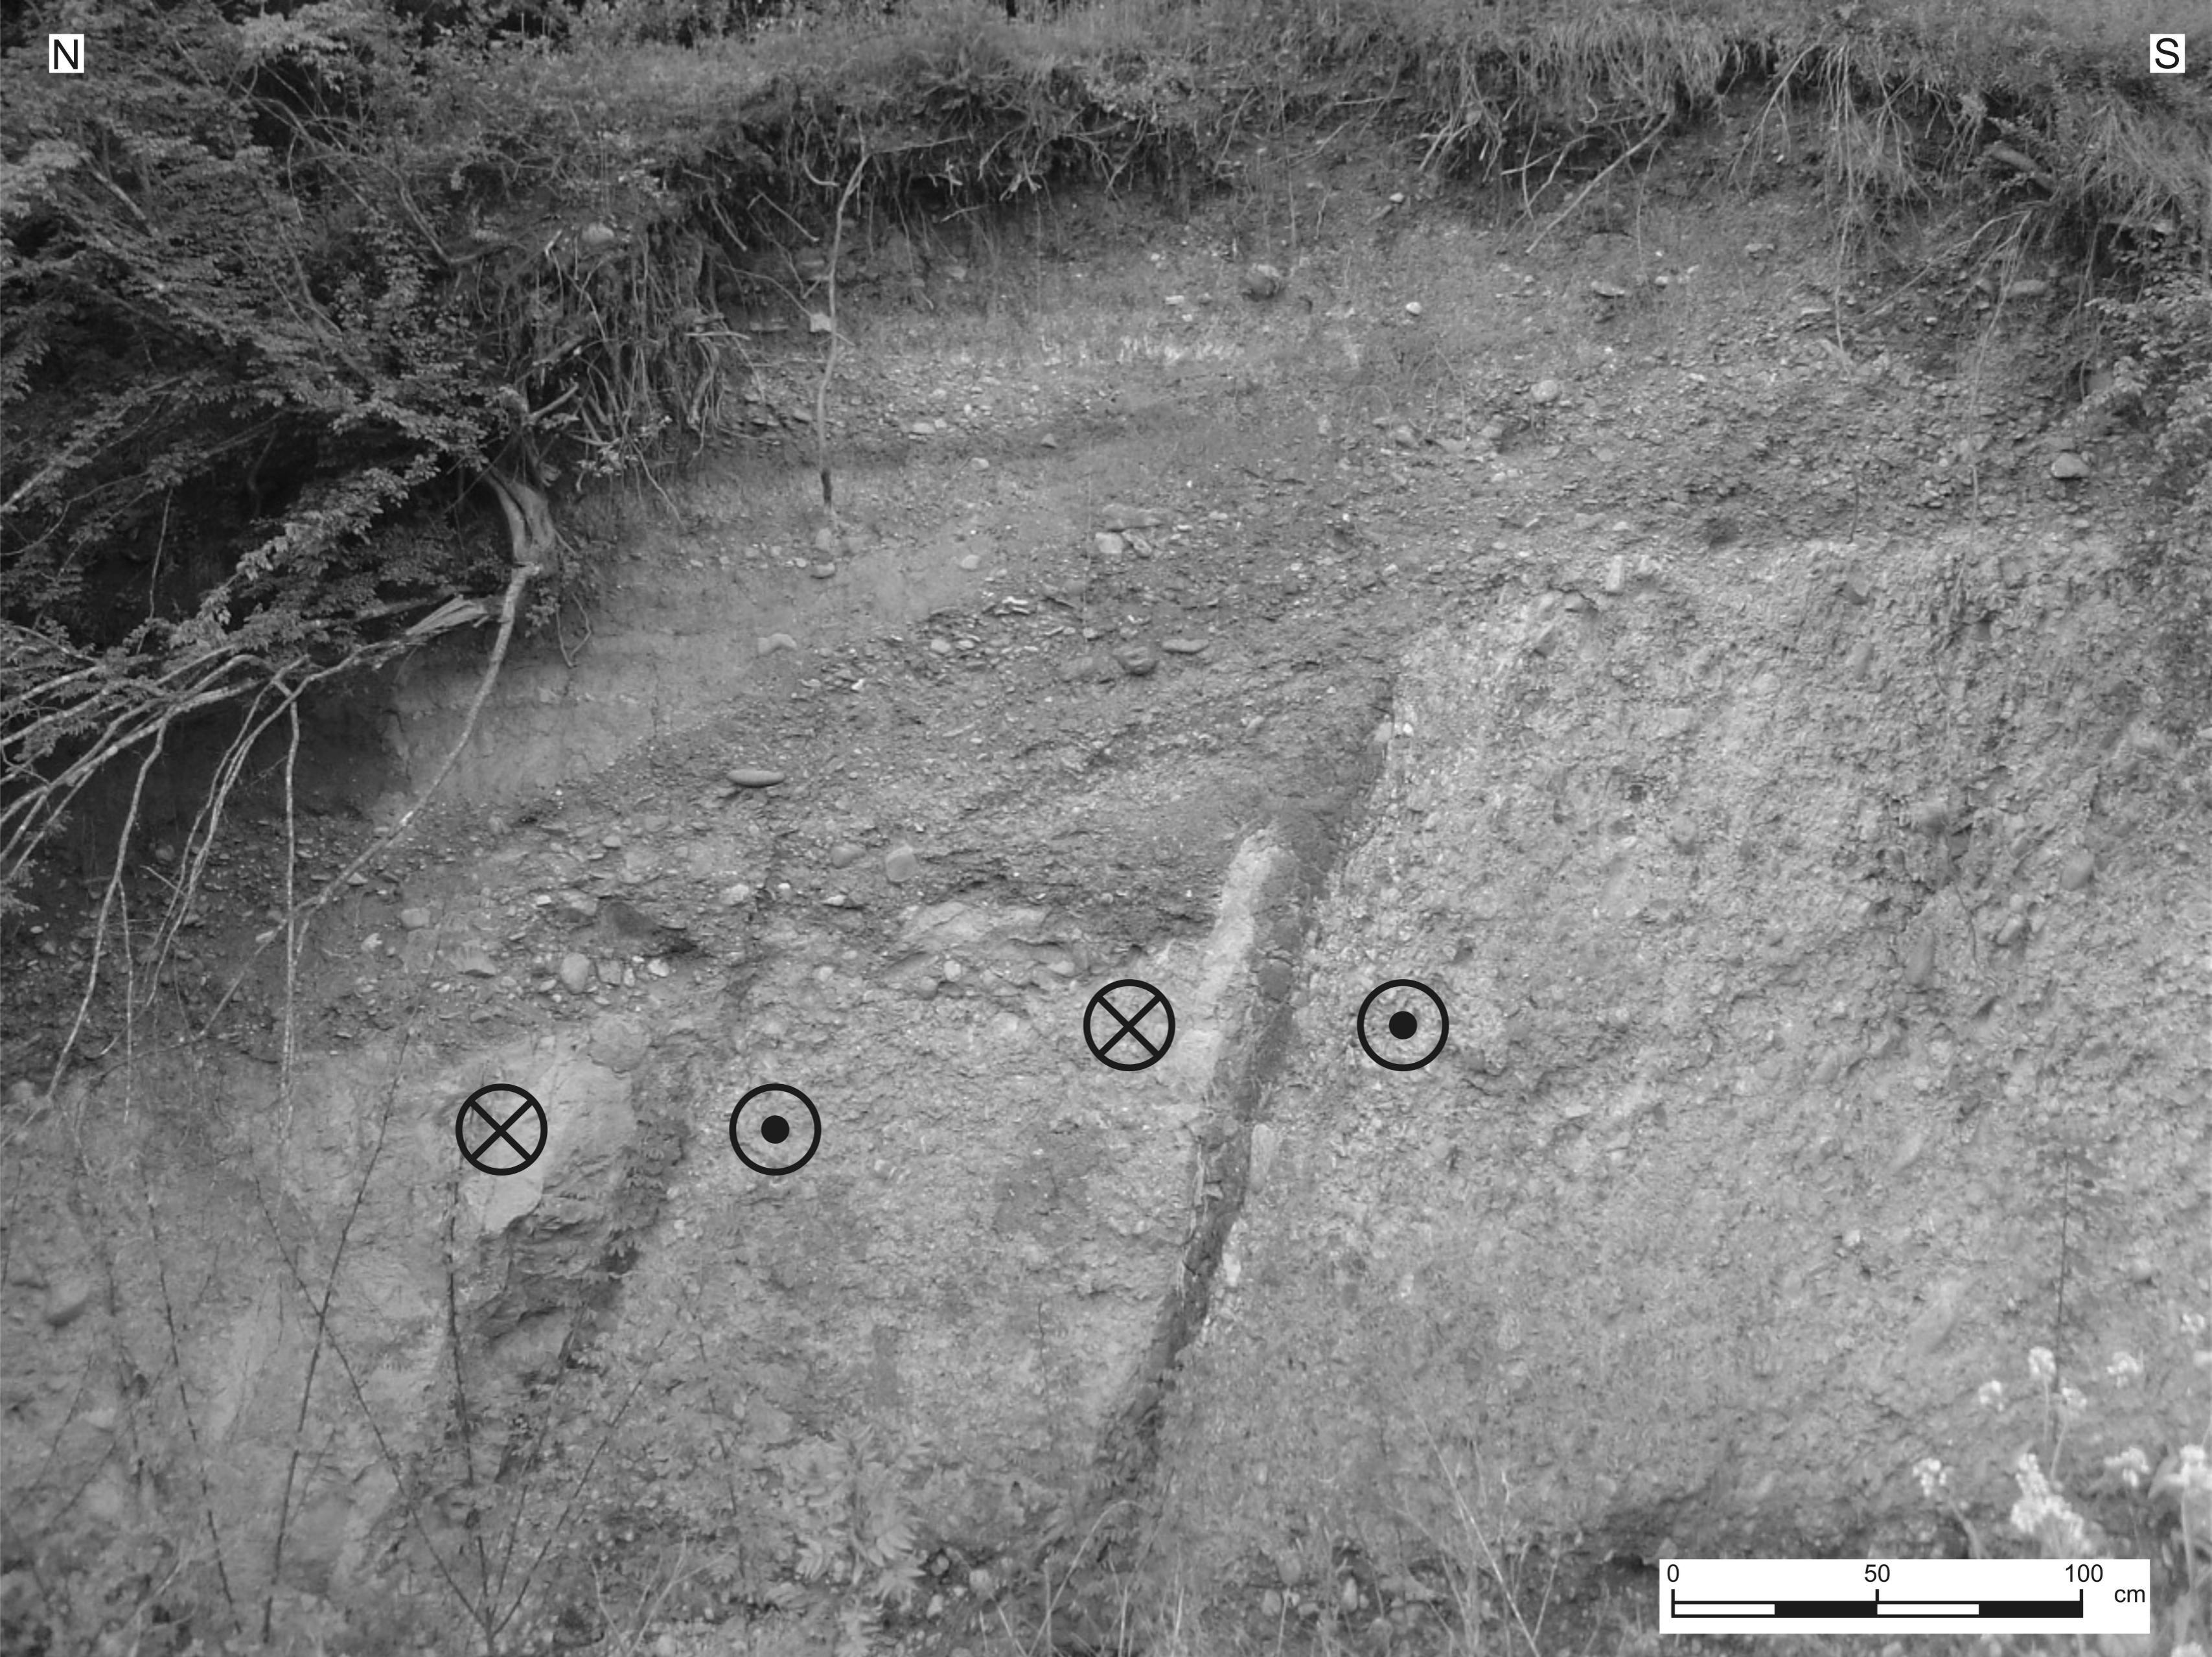

Supplement: Supplementary file 9 [file 1]

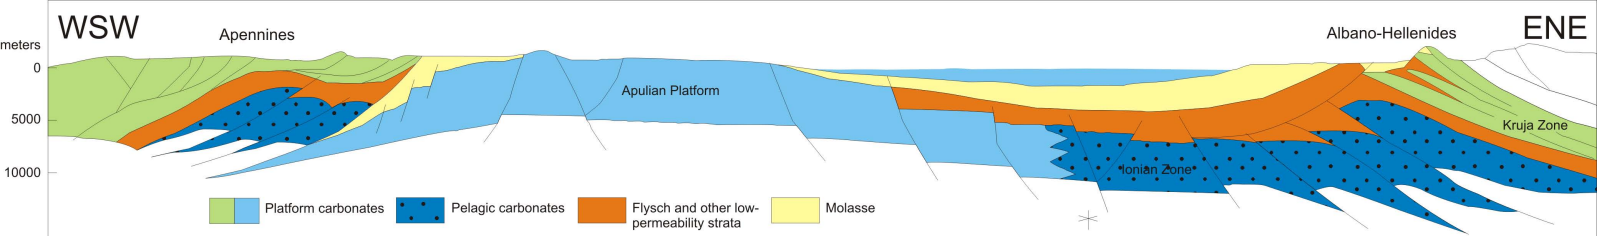

Nemcok et al - Kura study - EA Fig. 9

Supplement: Supplementary file 11 [file 1]

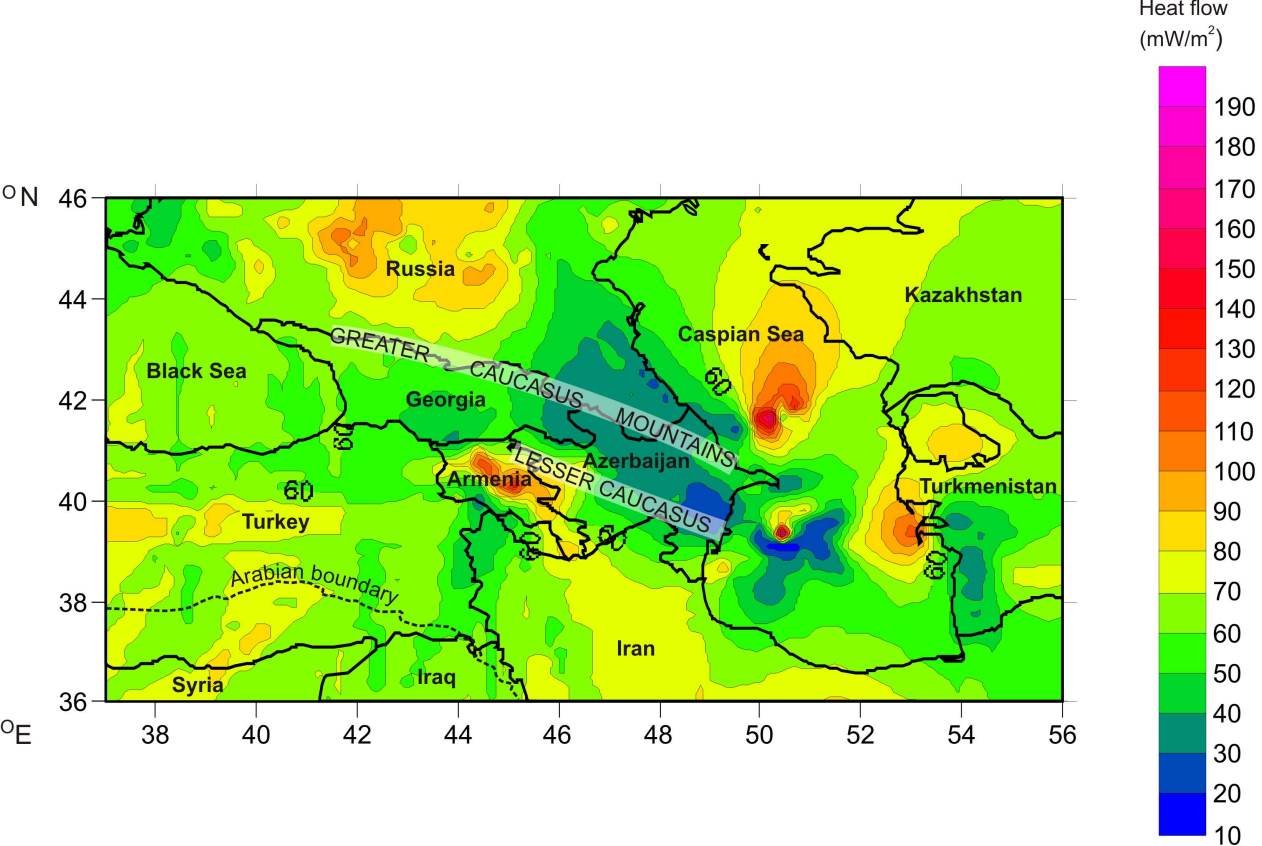

Nemcok et al - Kura study - EA Fig. 6a

# Longitude 45°-45.99°

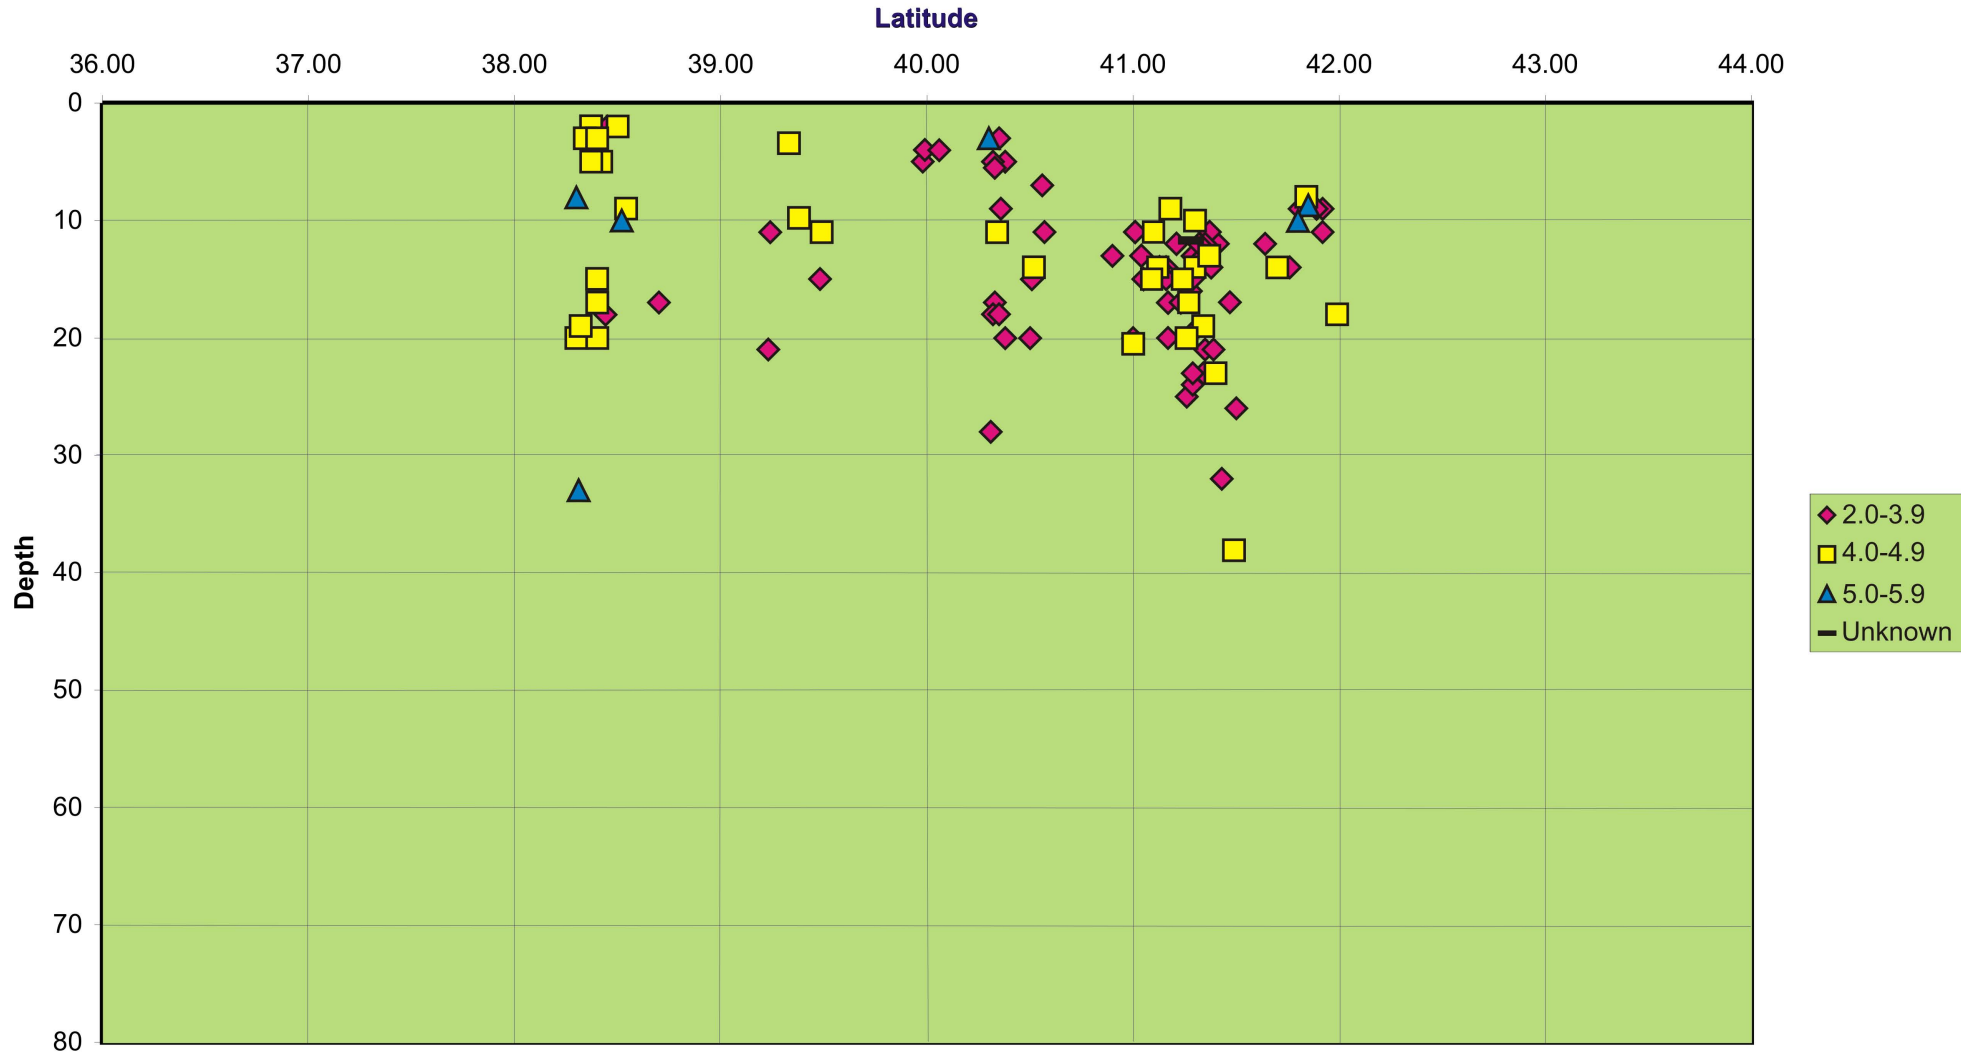

# Longitude 46°-46.99°

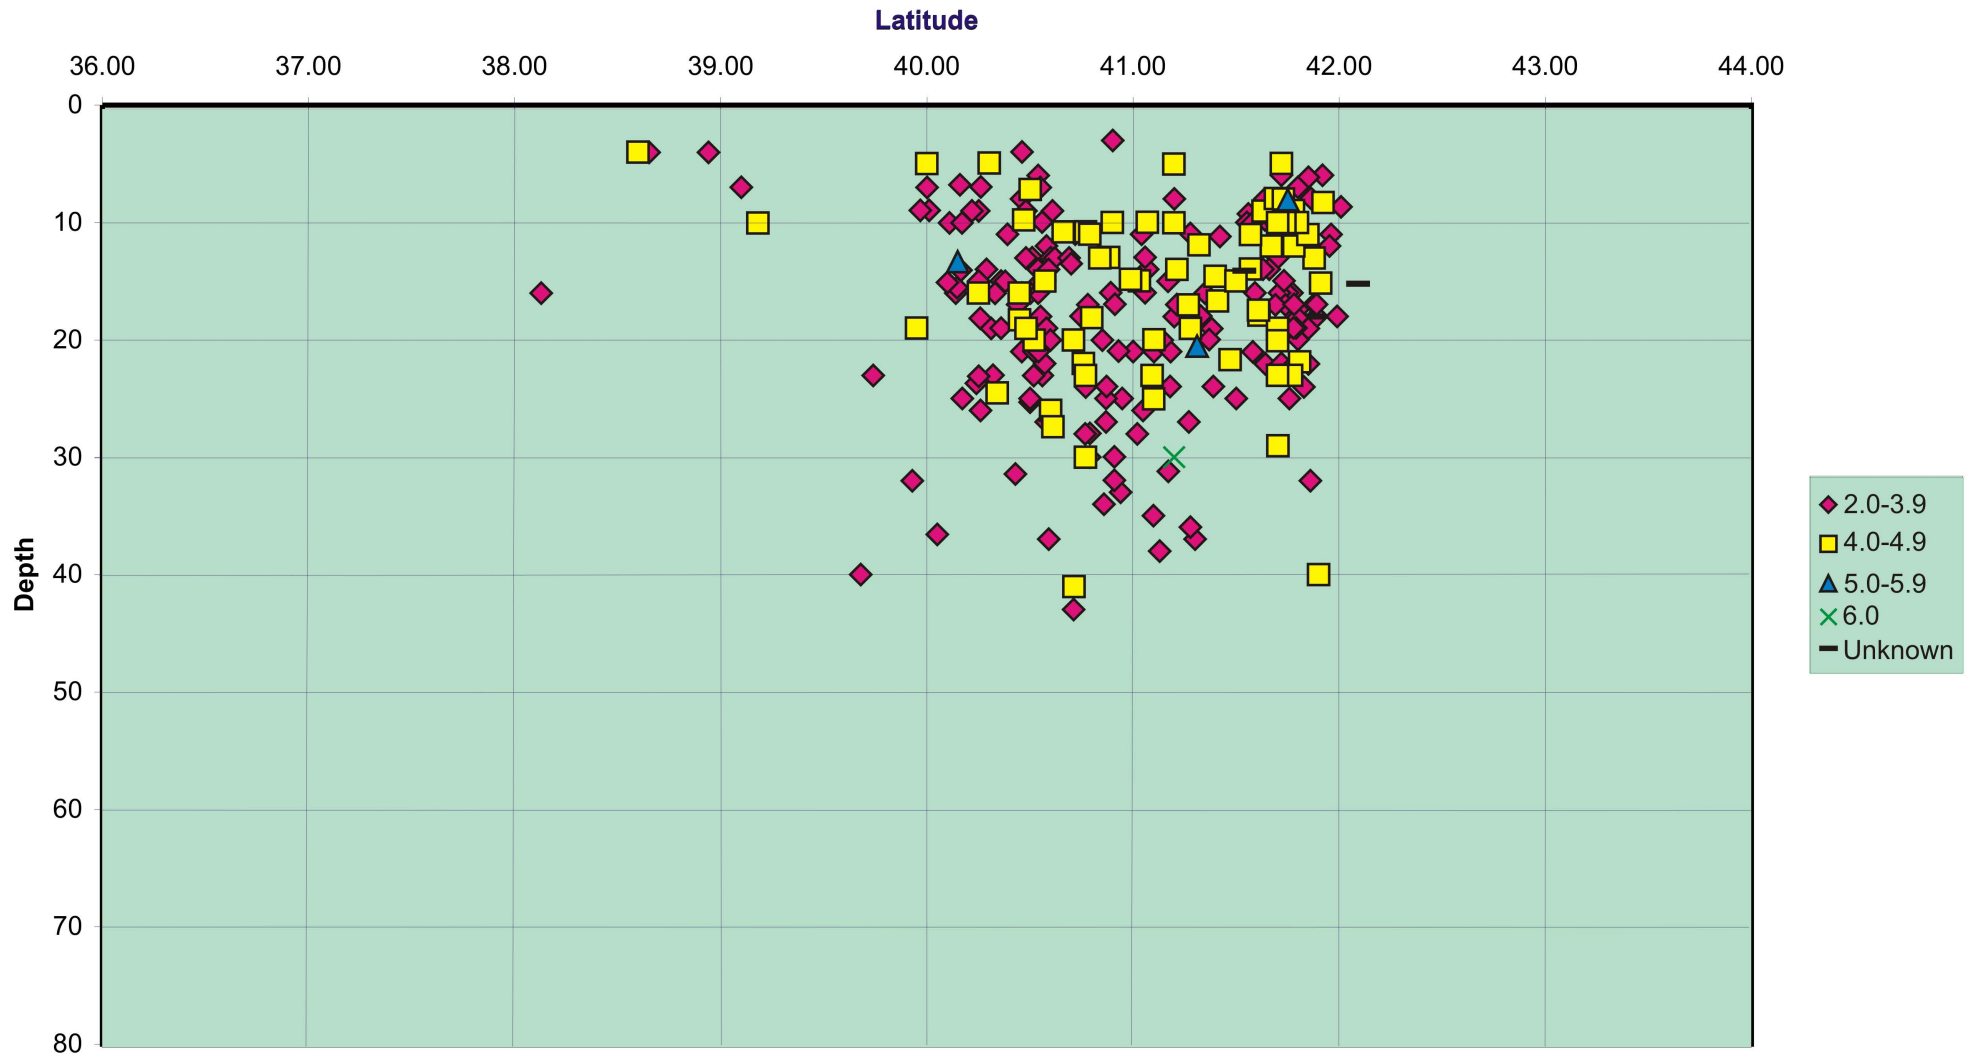

# Longitude 47°-47.99°

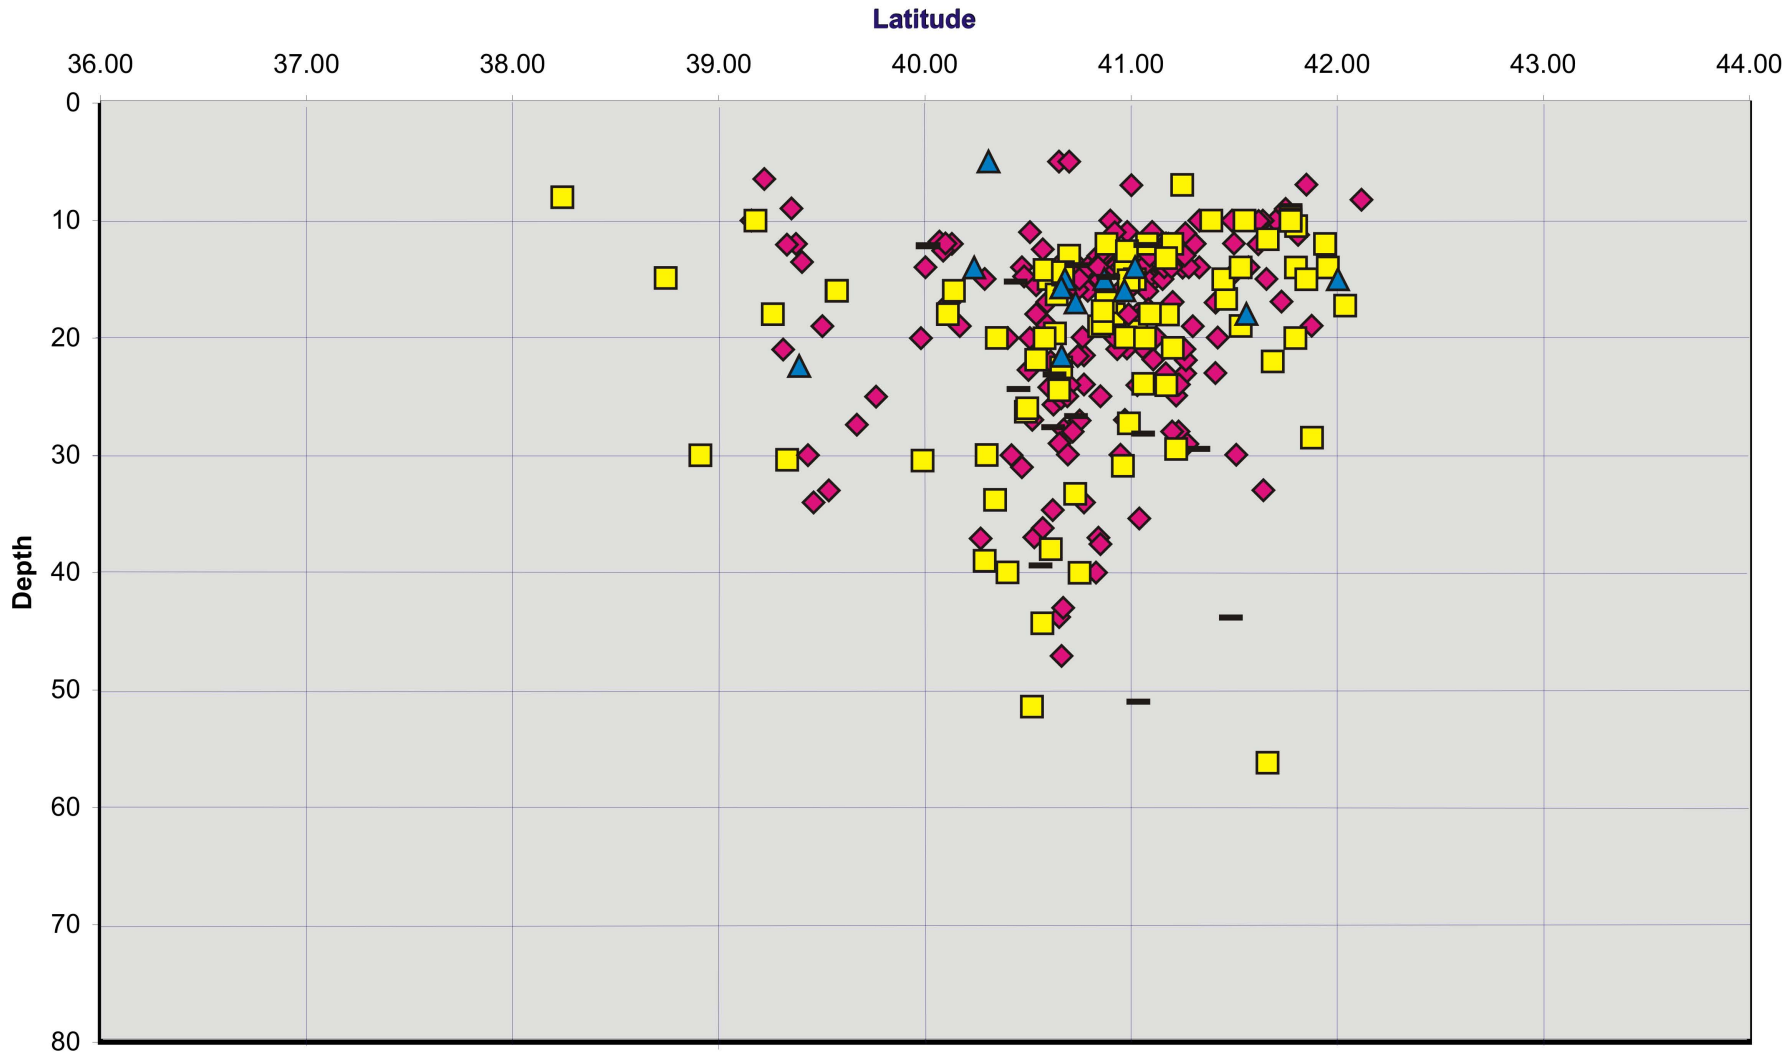

# Longitude 48°-48.99°

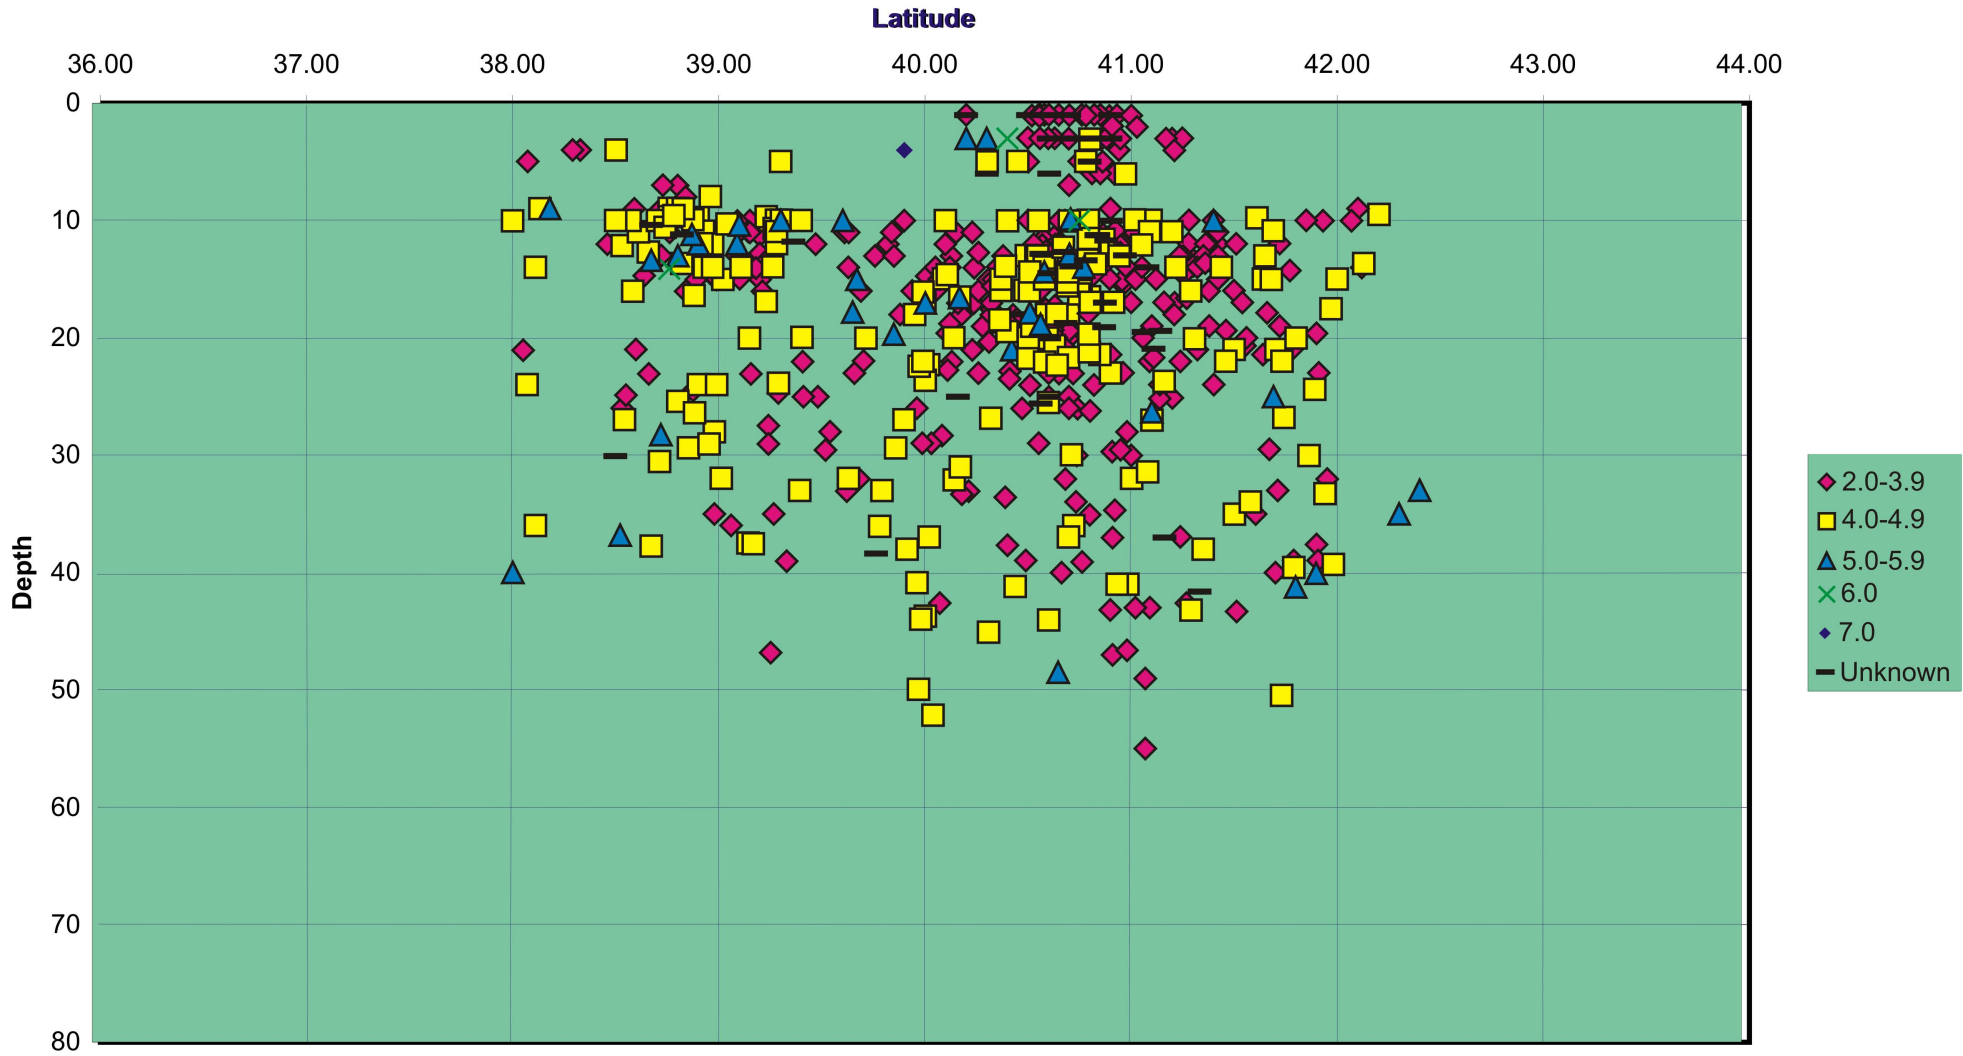

# Longitude 49°-49.99°

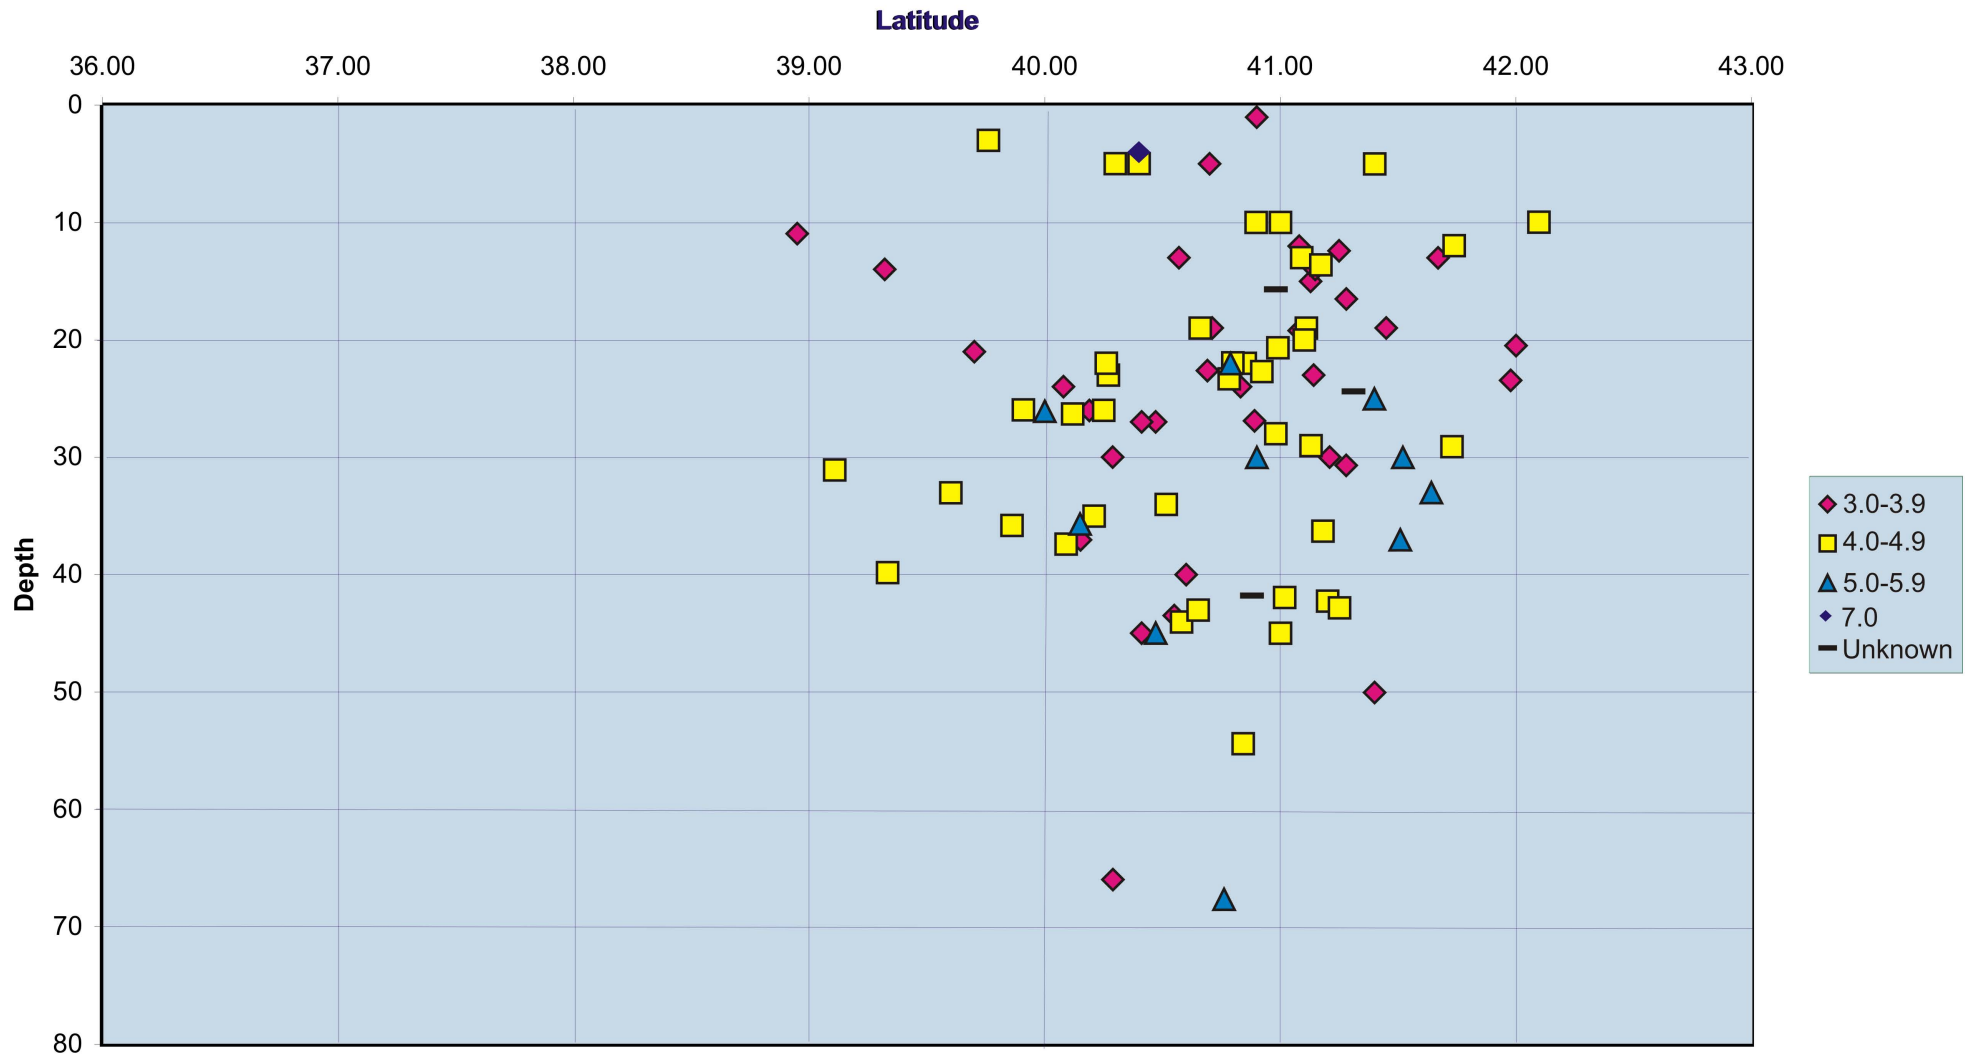

Supplement: Supplementary file 12 [file 1]
